# Supplementary material for: Aluminum complexes containing salicylbenzoxazole ligands and their application in the ring-opening polymerization of rac-lactide and ε-caprolactone
Source: Royal Society of Chemistry journal article supplement (doi:10.1039/c6dt00990e), 2016-01-01
Supplement: c6dt00990e1.pdf [file c6dt00990e1.pdf]

**Electronic Supplementary Information**  
for  
**Aluminum complexes containing salicylbenzoxazole ligands  
and their application in the ring-opening polymerization of  
*rac*-lactide and  $\epsilon$ -caprolactone**

Pattarawut Sumrit,<sup>†</sup> Pitak Chuawong,<sup>§</sup> Tanin Nanok,<sup>‡</sup>  
Tanwawan Duangthongyou,<sup>‡</sup> Pimpa Homnirun<sup>\*,†</sup>

*<sup>†</sup>Laboratory of Catalysts and Advanced Polymer Materials, Department of Chemistry and Center of Excellence for Innovation in Chemistry, Faculty of Science, and <sup>§</sup>Department of Chemistry and Center of Excellence for Innovation in Chemistry, Faculty of Science, and Special Research Unit for Advanced Magnetic Resonance (AMR), and <sup>‡</sup>Department of Chemistry, Faculty of Science, Kasetsart University, Bangkok 10900, Thailand*

\*E-mail: fscipph@ku.ac.th

## Synthesis of 2-hydroxy-3-(1,1-diphenylethyl)-5-methylbenzaldehyde

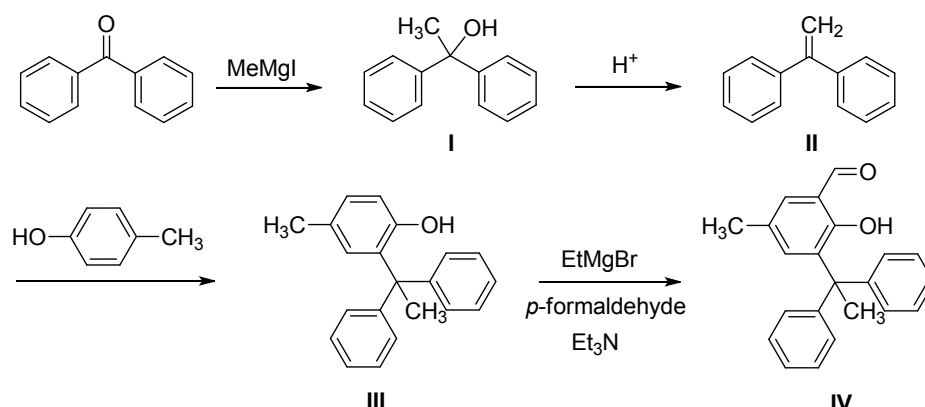

Fig. S1 Synthesis of 2-hydroxy-3-(1,1-diphenylethyl)-5-methylbenzaldehyde.

### Synthesis of 1,1-diphenylethanol (I)

To a stirred solution of benzophenone (10.00 g, 54.86 mmol) in diethyl ether (300 mL) was slowly added methylmagnesium iodide (21.95 mL of a 3.0 M solution in diethyl ether, 65.83 mmol) at 0 °C. The reaction mixture was stirred at room temperature for 15 h and a saturated solution of ammonium chloride (50 mL) was then added. The organic phase was separated and the volatiles were removed under reduced pressure to provide a brown solid which was purified by column chromatography (hexane). The product was obtained in 10.12 g (93%).

<sup>1</sup>H NMR (500.13 MHz, CDCl<sub>3</sub>, 300 K): δ 7.45–7.42 (m, 4H, ArH), 7.36–7.32 (m, 4H, ArH), 7.28–7.24 (m, 2H, ArH), 2.45 (s, 1H, OH), 2.02 (s, 3H, CH<sub>3</sub>).

<sup>13</sup>C NMR (125.77 MHz, CDCl<sub>3</sub>, 300 K): δ 147.9 (ArC), 128.0 (ArCH), 126.8 (ArCH), 125.8 (ArCH), 76.1 (C), 30.7 (CH<sub>3</sub>).

### Synthesis of 1,1-diphenylethene (II)

To a stirred solution of 1,1-diphenylethanol (I) (15.00 g, 75.66 mmol) in ethanol (100 mL) was added slowly H<sub>2</sub>SO<sub>4</sub> (10.00 mL). The reaction mixture was stirred at room temperature for 24 h. After removal of the volatiles, the product was extracted with dichloromethane. The organic phase was concentrated and purified by column chromatography (hexane). A colorless oil was obtained in 13.00 g (95%).

<sup>1</sup>H NMR (500.13 MHz, CDCl<sub>3</sub>, 300 K): δ 7.42–7.38 (m, 10H, ArH), 5.53 (s, 2H, CH<sub>2</sub>).

<sup>13</sup>C NMR (125.77 MHz, CDCl<sub>3</sub>, 300 K): δ 150.0 (C), 141.5 (ArC), 128.2 (ArCH), 128.1 (ArCH), 127.7 (ArCH), 114.2 (CH<sub>2</sub>).

### Synthesis of 2-(1,1-diphenylethyl)-4-methylphenol (III)

To a stirred solution of 1,1-diphenylethene (**II**) (13.00 g, 72.12 mmol) in toluene (100 mL) was added *p*-cresol (7.80 g, 72.12 mmol) and H<sub>2</sub>SO<sub>4</sub> (5.00 mL). The reaction mixture was stirred at room temperature for 24 h. To this reaction, a saturated solution of NaHCO<sub>3</sub> (50 mL) was then added. The organic phase was separated and dried under vacuum to provide a brown oil which was then purified by column chromatography (hexane). The white solid was obtained in 14.00 g (67%).

<sup>1</sup>H NMR (500.13 MHz, CDCl<sub>3</sub>, 300 K): δ 7.36–7.32 (m, 4H, ArH), 7.29–7.26 (m, 5H, ArH), 7.02 (dd, <sup>3</sup>J<sub>HH</sub> = 8.0 Hz, <sup>4</sup>J<sub>HH</sub> = 2.1 Hz, 1H, ArH), 6.76 (d, <sup>4</sup>J<sub>HH</sub> = 2.0 Hz, 1H, ArH), 6.76–6.73 (m, 2H, ArH), 4.37 (s, 1H, OH), 2.22 (s, 3H, CH<sub>3</sub>), 2.21 (s, 3H, CH<sub>3</sub>).

<sup>13</sup>C NMR (125.77 MHz, CDCl<sub>3</sub>, 300 K): δ 151.8 (ArC), 146.4 (ArC), 134.1 (ArC), 129.7 (ArCH), 129.6 (ArC), 128.8 (ArCH), 128.5 (ArCH), 128.2 (ArCH), 126.7 (ArCH), 117.8 (ArCH), 51.0 (C), 29.3 (CH<sub>3</sub>), 20.8 (CH<sub>3</sub>).

### Synthesis of 2-hydroxy-3-(1,1-diphenylethyl)-5-methylbenzaldehyde (IV)

To a stirred solution of 2-(1,1-diphenylethyl)-4-methylphenol (**III**) (10.00 g, 34.68 mmol) in THF (100 mL) was slowly added ethylmagnesium bromide (17.34 mL of a 3.0 M solution in diethyl ether, 52.05 mmol) at 0 °C. After the reaction mixture was stirred overnight at room temperature, the volatiles were removed under reduced pressure and then toluene (200 mL) was added. To this solution was then added a mixture of triethylamine (7.24 mL, 52.05 mmol) and paraformaldehyde (2.60 g, 86.70 mmol) in toluene (40 mL). The reaction mixture was stirred at 110 °C for 2 h. Hydrochloric acid (2.0 M, 25 mL) was then added to the reaction mixture. The product was extracted with diethyl ether (3 × 100 mL) and the organic phase was separated. The combined organic phase was dried over MgSO<sub>4</sub>, filtered and evaporated under reduced pressure to provide a yellow oil. The crude product was purified by column chromatography (hexane:ethyl acetate = 80:20). The product was obtained as a white solid in 7.07 g (64%).

<sup>1</sup>H NMR (500.13 MHz, CDCl<sub>3</sub>, 300 K): δ 11.44 (s, 1H, OH), 9.85 (s, 1H, ArCHO), 7.33–7.24 (m, 7H, ArH), 7.17–7.15 (m, 4H, ArH), 6.76 (d, <sup>4</sup>J<sub>HH</sub> = 2.2 Hz, 1H, ArH), 2.35 (s, 3H, CH<sub>3</sub>), 2.21 (s, 3H, CH<sub>3</sub>).

<sup>13</sup>C NMR (125.77 MHz, CDCl<sub>3</sub>, 300 K): δ 196.7 (ArCHO), 196.6 (ArC), 158.4 (ArC), 147.6 (ArC), 138.7 (ArCH), 136.9 (ArC), 132.3 (ArCH), 128.2 (ArCH), 127.9 (ArCH), 126.0 (ArCH), 120.6 (ArC), 51.5 (C), 27.4 (CH<sub>3</sub>), 20.5 (CH<sub>3</sub>).

### Synthesis of 2-[(2'-hydroxyphenyl)imino]methylphenol (1)

To a stirred solution of 2-aminophenol (6.00 g, 54.98 mmol) in ethanol (100 mL) was slowly added 2-hydroxybenzaldehyde (6.71 g, 54.98 mmol). Formic acid (2–4 drops) was added as a catalyst. The reaction mixture was then refluxed at 90 °C for 2 h. After cooling to room temperature, red crystals formed. The crystals were collected by filtration and dried under vacuum. Yield: 11.12 g, 95%.

<sup>1</sup>H NMR (500.13 MHz, [D<sub>6</sub>]DMSO, 300 K): δ 13.82 (br s, 1H, **OH**), 9.75 (br s, 1H, **OH**), 8.97 (s, 1H, **CH=N**), 7.62 (dd, <sup>4</sup>J<sub>HH</sub> = 1.5 Hz, <sup>3</sup>J<sub>HH</sub> = 7.8 Hz, 1H, **ArH**), 7.40–7.35 (m, 2H, **ArH**), 7.14 (dt, <sup>4</sup>J<sub>HH</sub> = 1.5 Hz, <sup>3</sup>J<sub>HH</sub> = 7.7 Hz, 1H, **ArH**), 6.99 (d, <sup>3</sup>J<sub>HH</sub> = 8.0 Hz, 1H, **ArH**), 6.96–6.94 (m, 2H, **ArH**), 6.89 (dt, <sup>4</sup>J<sub>HH</sub> = 1.2 Hz, <sup>3</sup>J<sub>HH</sub> = 7.6 Hz, 1H, **ArH**).

<sup>13</sup>C NMR (125.77 MHz, [D<sub>6</sub>]DMSO, 300 K): δ 162.4 (**CH=N**), 161.4 (**ArC**), 151.8 (**ArC**), 135.7 (**ArC**), 133.5 (**ArCH**), 133.0 (**ArCH**), 128.7 (**ArCH**), 120.3 (**ArCH**), 120.2 (**ArC**), 119.4 (**ArCH**), 117.4 (**ArCH**), 117.2 (**ArCH**).

### Synthesis of 2,4-dimethyl-6-[(2'-hydroxyphenyl)imino]methyl}phenol (2)

To a stirred solution of 2-aminophenol (5.00 g, 45.82 mmol) in ethanol (100 mL) was slowly added 3,5-dimethyl-2-hydroxybenzaldehyde (6.88 g, 45.82 mmol). Formic acid (2-4 drops) was added as a catalyst. The reaction mixture was then refluxed at 90 °C for 2 h. After cooling to room temperature, red crystals formed. The crystals were collected by filtration and dried under vacuum. Yield: 7.90 g, 71%.

<sup>1</sup>H NMR (500.13 MHz, [D<sub>6</sub>]DMSO, 300 K): δ 13.90 (s, 1H, **OH**), 9.73 (s, 1H, **OH**), 8.88 (s, 1H, **CH=N**) 7.34 (d, <sup>3</sup>J<sub>HH</sub> = 7.6 Hz, 1H, **ArH**), 7.21 (s, 1H, **ArH**), 7.12 (t, <sup>3</sup>J<sub>HH</sub> = 7.5 Hz, 1H, **ArH**), 7.10 (s, 1H, **ArH**), 6.97 (d, <sup>3</sup>J<sub>HH</sub> = 8.0 Hz, 1H, **ArH**), 6.88 (t, <sup>3</sup>J<sub>HH</sub> = 7.4 Hz, 1H, **ArH**), 2.25 (s, 3H, **CH<sub>3</sub>**), 2.19 (s, 3H, **CH<sub>3</sub>**).

<sup>13</sup>C NMR (125.77 MHz, [D<sub>6</sub>]DMSO, 300 K): δ 162.6 (**CH=N**), 157.6 (**ArC**), 151.8 (**ArC**), 135.7 (**ArC**), 135.3 (**ArCH**), 130.5 (**ArCH**), 128.6 (**ArCH**), 127.3 (**ArC**), 125.6 (**ArC**), 120.3 (**ArCH**), 118.9 (**ArC**), 117.2 (**ArCH**), 20.6 (**CH<sub>3</sub>**), 15.9 (**CH<sub>3</sub>**).

### Synthesis of 2,4-(di-*tert*-butyl)-6-[(2'-hydroxyphenyl)imino]methyl}phenol (3)

To a stirred solution of 2-aminophenol (4.60 g, 42.15 mmol) in ethanol (100 mL) was slowly added 3,5-di-*tert*-butyl-2-hydroxybenzaldehyde (9.87 g, 42.15 mmol). Formic acid (2-4 drops) was added as a catalyst. The reaction mixture was then refluxed at 90 °C for 2 h. After cooling to room temperature, yellow crystals formed. The crystals were collected by filtration and dried under vacuum. Yield: 10.42 g, 95%.

<sup>1</sup>H NMR (500.13 MHz, CDCl<sub>3</sub>, 300 K): δ 8.71 (s, 1H, **CH=N**), 7.50 (d, <sup>4</sup>J<sub>HH</sub> = 2.4 Hz, 1H, **ArH**), 7.27 (d, <sup>4</sup>J<sub>HH</sub> = 3.0 Hz, 1H, **ArH**), 7.23–7.19 (m, 1H, **ArH**), 7.16 (dd, <sup>4</sup>J<sub>HH</sub> = 1.5 Hz, <sup>3</sup>J<sub>HH</sub> = 7.9 Hz, 1H, **ArH**), 7.03 (dd, <sup>4</sup>J<sub>HH</sub> = 1.3 Hz, <sup>3</sup>J<sub>HH</sub> = 8.1 Hz, 1H, **ArH**), 6.98–6.94 (m, 1H, **ArH**), 1.48 (s, 9H, **C(CH<sub>3</sub>)<sub>3</sub>**), 1.35 (s, 9H, **C(CH<sub>3</sub>)<sub>3</sub>**).

<sup>13</sup>C NMR (125.77 MHz, CDCl<sub>3</sub>, 300 K): δ 165.4 (**CH=N**), 158.0 (**ArC**), 150.1 (**ArC**), 141.5 (**ArC**), 137.4 (**ArC**), 136.3 (**ArC**), 129.0 (**ArCH**), 128.6 (**ArCH**), 127.5 (**ArCH**), 121.2 (**ArCH**), 118.8 (**ArC**), 118.5 (**ArCH**), 118.0 (**ArCH**), 35.4 (**C(CH<sub>3</sub>)<sub>3</sub>**), 34.5 (**C(CH<sub>3</sub>)<sub>3</sub>**), 31.7 (**C(CH<sub>3</sub>)<sub>3</sub>**), 29.7 (**C(CH<sub>3</sub>)<sub>3</sub>**).

#### Synthesis of 2,4-dichloro-6- $\{[(2'$ -hydroxyphenyl)imino]methyl}phenol (4)

To a stirred solution of 2-aminophenol (1.70 g, 15.58 mmol) in ethanol (30 mL) was slowly added 3,5-dichloro-2-hydroxybenzaldehyde (2.98 g, 15.58 mmol). Formic acid (2-4 drops) was added as a catalyst. The reaction mixture was then refluxed at 90 °C for 2 h. After cooling to room temperature, red crystals formed. The crystals were collected by filtration and dried under vacuum. Yield: 4.06 g, 92%.

$^1\text{H}$  NMR (500.13 MHz,  $[\text{D}_6]$ DMSO, 300 K):  $\delta$  10.22 (s, 1H, OH), 9.07 (s, 1H, CH=N), 7.65 (d,  $^4J_{\text{HH}} = 2.6$  Hz, 1H, ArH), 7.62 (d,  $^4J_{\text{HH}} = 2.6$  Hz, 1H, ArH), 7.50 (dd,  $^4J_{\text{HH}} = 1.5$  Hz,  $^3J_{\text{HH}} = 8.0$  Hz, 1H, ArH), 7.21–7.18 (m, 1H, ArH), 7.01 (dd,  $^4J_{\text{HH}} = 1.3$  Hz,  $^3J_{\text{HH}} = 8.1$  Hz, 1H, ArH), 6.95–6.91 (m, 1H, ArH).

$^{13}\text{C}$  NMR (125.77 MHz,  $[\text{D}_6]$ DMSO, 300 K):  $\delta$  160.1 (CH=N), 159.5 (ArC), 151.6 (ArC), 132.9 (ArC), 131.9 (ArC), 130.9 (ArCH), 129.8 (ArCH), 123.6 (ArC), 120.7 (ArC), 120.4 (ArCH), 120.1 (ArCH), 119.7 (ArCH), 117.4 (ArCH).

#### Synthesis of 2,4-dibromo-6- $\{[(2'$ -hydroxyphenyl)imino]methyl}phenol (5)

To a stirred solution of 2-aminophenol (0.78 g, 7.14 mmol) in ethanol (100 mL) was slowly added 3,5-dibromo-2-hydroxybenzaldehyde (2.04 g, 7.14 mmol). Formic acid (2-4 drops) was added as a catalyst. The reaction mixture was then refluxed at 90 °C for 2 h. After cooling to room temperature, red crystals formed. The crystals were collected by filtration and dried under vacuum. Yield: 1.83 g, 90%.

$^1\text{H}$  NMR (500.13 MHz,  $[\text{D}_6]$ DMSO, 300 K):  $\delta$  15.66 (br s, 1H, OH), 10.23 (br s, 1H, OH), 9.06 (s, 1H, CH=N), 7.87–7.84 (m, 1H, ArH), 7.78 (m, 1H, ArH), 7.71 (d,  $^3J_{\text{HH}} = 7.6$  Hz, 1H, ArH), 7.20 (t,  $^3J_{\text{HH}} = 7.3$  Hz, 1H, ArH), 7.02 (d,  $^3J_{\text{HH}} = 8.0$  Hz, 1H, ArH), 6.93 (t,  $^3J_{\text{HH}} = 6.0$  Hz, 1H, ArH).

$^{13}\text{C}$  NMR (125.77 MHz,  $[\text{D}_6]$ DMSO, 300 K):  $\delta$  161.6 (CH=N), 159.4 (ArC), 151.6 (ArC), 138.3 (ArCH), 134.7 (ArCH), 131.6 (ArC), 129.8 (ArCH), 120.6 (ArC), 120.4 (ArCH), 119.7 (ArCH), 117.4 (ArCH), 114.2 (ArC), 107.8 (ArC).

#### Synthesis of 2-isopropyl-6- $\{[(2'$ -hydroxyphenyl)imino]methyl}phenol (6)

To a stirred solution of 2-aminophenol (3.30 g, 30.24 mmol) in ethanol (100 mL) was slowly added 3-isopropyl-2-hydroxybenzaldehyde (5.00 g, 30.24 mmol). Formic acid (2-4 drops) was added as a catalyst. The reaction mixture was then refluxed at 90 °C for 2 h. After the removal of the volatiles, an orange oil was obtained which was then recrystallized from cold hexane. Orange crystals were collected by filtration and dried under vacuum. Yield: 5.30 g, 69%.

$^1\text{H}$  NMR (500.13 MHz,  $\text{CDCl}_3$ , 300 K):  $\delta$  12.59 (br s, 1H, OH), 8.69 (s, 1H, CH=N), 7.38 (d,  $^3J_{\text{HH}} = 7.5$  Hz, 1H, ArH), 7.28 (d,  $^3J_{\text{HH}} = 7.6$  Hz, 1H, ArH), 7.22 (t,  $^3J_{\text{HH}} = 7.6$  Hz, 1H, ArH), 7.15 (d,  $^3J_{\text{HH}} = 7.8$  Hz, 1H, ArH), 7.04 (d,  $^3J_{\text{HH}} = 8.1$  Hz, 1H, ArH), 6.97 (t,  $^3J_{\text{HH}} = 7.6$  Hz, 2H, ArH), 5.83 (br s, 1H, OH), 3.45 (sept, 1H, CH(CH<sub>3</sub>)<sub>2</sub>), 1.30 (d,  $^3J_{\text{HH}} = 6.9$  Hz, 6H, CH(CH<sub>3</sub>)<sub>2</sub>).

$^{13}\text{C}$  NMR (125.77 MHz,  $\text{CDCl}_3$ , 300 K):  $\delta$  164.6 ( $\text{CH}=\text{N}$ ), 158.3 (ArC), 150.1 (ArC), 136.9 (ArC), 136.1 (ArC), 130.8 (ArCH), 130.6 (ArCH), 128.8 (ArCH), 121.3 (ArCH), 119.6 (ArCH), 118.9 (ArC), 118.5 (ArCH), 116.1 (ArCH), 26.8 ( $\text{CH}(\text{CH}_3)_2$ ), 22.6 ( $\text{CH}(\text{CH}_3)_2$ ).

#### Synthesis of 2-*tert*-butyl-6- $\{[(2'$ -hydroxyphenyl)imino]methyl}phenol (7)

To a stirred solution of 2-aminophenol (1.20 g, 11.00 mmol) in ethanol (100 mL) was slowly added 3-*tert*-butyl-2-hydroxybenzaldehyde (2.00 g, 11.00 mmol). Formic acid (2-4 drops) was added as a catalyst. The reaction mixture was then refluxed at 90 °C for 2 h. After the removal of the volatiles, a yellow oil was obtained which was then recrystallized from cold hexane. Yellow crystals were collected by filtration and dried under vacuum. Yield: 2.17 g, 72%.

$^1\text{H}$  NMR (500.13 MHz,  $\text{CDCl}_3$ , 300 K):  $\delta$  12.94 (br s, 1H, OH), 8.71 (s, 1H,  $\text{CH}=\text{N}$ ), 7.49 (d,  $^3J_{\text{HH}} = 7.4$  Hz, 1H, ArH), 7.33 (d,  $^3J_{\text{HH}} = 7.4$  Hz, 1H, ArH), 7.26 (t,  $^3J_{\text{HH}} = 7.5$  Hz, 1H, ArH), 7.18 (d,  $^3J_{\text{HH}} = 7.6$  Hz, 1H, ArH), 7.09 (d,  $^3J_{\text{HH}} = 7.8$  Hz, 1H, ArH), 7.02 (t,  $^3J_{\text{HH}} = 7.3$  Hz, 1H, ArH), 6.98 (t,  $^3J_{\text{HH}} = 7.7$  Hz, 1H, ArH), 1.54 (s, 9H,  $(\text{CH}_3)_3$ ).

$^{13}\text{C}$  NMR (125.77 MHz,  $\text{CDCl}_3$ , 300 K):  $\delta$  164.9 ( $\text{CH}=\text{N}$ ), 160.3 (ArC), 150.1 (ArC), 138.0 (ArC), 136.0 (ArC), 131.4 (ArCH), 131.3 (ArCH), 128.8 (ArCH), 121.3 (ArCH), 119.5 (ArC), 119.2 (ArCH), 118.6 (ArCH), 116.1 (ArCH), 35.2 ( $\text{C}(\text{CH}_3)_3$ ), 29.6 ( $\text{C}(\text{CH}_3)_3$ ).

#### Synthesis of 2-phenyl-6- $\{[(2'$ -hydroxyphenyl)imino]methyl}phenol (8)

To a stirred solution of 2-aminophenol (2.75 g, 25.20 mmol) in ethanol (100 mL) was slowly added 3-phenyl-2-hydroxybenzaldehyde (5.00 g, 25.20 mmol). Formic acid (2-4 drops) was added as a catalyst. The reaction mixture was then refluxed at 90 °C for 2 h. After cooling to room temperature, red crystals formed. The crystals were collected by filtration and dried under vacuum. Yield: 6.20 g, 85%.

$^1\text{H}$  NMR (500.13 MHz,  $\text{CDCl}_3$ , 300 K):  $\delta$  13.01 (s, 1H, OH), 8.75 (s, 1H,  $\text{CH}=\text{N}$ ), 7.67–7.65 (m, 2H, ArH), 7.51 (dd,  $^4J_{\text{HH}} = 1.7$  Hz,  $^3J_{\text{HH}} = 7.5$  Hz, 1H, ArH), 7.50–7.46 (m, 2H, ArH), 7.44 (dd,  $^4J_{\text{HH}} = 1.7$  Hz,  $^3J_{\text{HH}} = 7.7$  Hz, 1H, ArH), 7.40–7.37 (m, 1H, ArH), 7.23–7.18 (m, 2H, ArH), 7.07 (t,  $^3J_{\text{HH}} = 7.6$  Hz, 1H, ArH), 6.99–6.96 (m, 2H, ArH).

$^{13}\text{C}$  NMR (125.77 MHz,  $\text{CDCl}_3$ , 300 K):  $\delta$  163.9 ( $\text{CH}=\text{N}$ ), 159.3 (ArC), 150.2 (ArC), 137.5 (ArC), 135.6 (ArC), 134.9 (ArCH), 132.4 (ArCH), 130.5 (ArC), 129.6 (ArCH), 129.1 (ArCH), 128.5 (ArCH), 127.7 (ArCH), 121.3 (ArCH), 119.8 (ArCH), 119.7 (ArC), 118.4 (ArCH), 116.3 (ArCH).

#### Synthesis of 2-(1,1-diphenylethyl)-4-methyl-6- $\{[(2'$ -hydroxyphenyl)imino]methyl}phenol (9)

To a stirred solution of 2-aminophenol (1.72 g, 15.80 mmol) in ethanol (100 mL) was slowly added 3-(1,1-diphenylethyl)-5-methyl-2-hydroxybenzaldehyde (5.00 g, 15.80 mmol). Formic acid (2-4 drops) was added as a catalyst. The reaction mixture was then refluxed at 90 °C for 2 h. After cooling to room temperature, red crystals formed. The crystals were collected by filtration and dried under vacuum. Yield: 5.00 g, 78%.

$^1\text{H}$  NMR (500.13 MHz,  $\text{CDCl}_3$ , 300 K):  $\delta$  12.43 (br s, 1H, **OH**), 8.64 (s, 1H, **CH=N**), 7.33–7.29 (m, 4H, **ArH**), 7.26–7.25 (m, 1H, **ArH**), 7.24 (t,  $^4J_{\text{HH}} = 2.3$  Hz, 1H, **ArH**), 7.22–7.13 (m, 5H, **ArH**), 7.16–7.15 (m, 1H, **ArH**), 7.10 (dd,  $^4J_{\text{HH}} = 1.5$  Hz,  $^3J_{\text{HH}} = 7.9$  Hz, 1H, **ArH**), 6.98 (dd,  $^4J_{\text{HH}} = 1.3$  Hz,  $^3J_{\text{HH}} = 8.1$  Hz, 1H, **ArH**), 6.96–6.92 (m, 1H **ArH**), 6.64–6.63 (m, 1H, **ArH**), 5.70 (br s, 1H, **OH**), 2.39 (s, 3H, **CH<sub>3</sub>**), 2.20 (s, 3H, **CH<sub>3</sub>**).

$^{13}\text{C}$  NMR (125.77 MHz,  $\text{CDCl}_3$ , 300 K):  $\delta$  164.5 (**CH=N**), 157.5 (**ArC**), 150.2 (**ArC**), 148.4 (**ArCH**), 136.7 (**ArC**), 136.1 (**ArC**), 136.0 (**ArCH**), 132.0 (**ArCH**), 128.8 (**ArCH**), 128.7 (**ArCH**), 128.2 (**ArCH**), 127.8 (**ArC**), 126.2 (**ArCH**), 121.2 (**ArCH**), 119.5 (**ArC**), 118.6 (**ArC**), 116.2 (**ArCH**), 52.1 (**C**), 27.9 (**CH<sub>3</sub>**), 21.0 (**CH<sub>3</sub>**).

### Synthesis of $\text{L}^3_2\text{AlOBn}$ (**10**)

To a stirred solution of **3b** (0.17 g, 0.25 mmol) in hexane (5 mL) was added one equivalent of benzyl alcohol (26  $\mu\text{L}$ , 0.25 mmol). The reaction mixture was stirred at 40 °C for 5 hours during which the time white solids precipitated. The solids were collected by filtration and dried under vacuum. Yield: 0.15 g, 79%.

$^1\text{H}$  NMR (500.13 MHz, toluene- $d_8$ , 343 K):  $\delta$  8.11–8.09 (m, 2H, **ArH**), 8.07 (d,  $^4J_{\text{HH}} = 2.6$  Hz, 2H, **ArH**), 7.55 (d,  $^4J_{\text{HH}} = 2.6$  Hz, 2H, **ArH**), 7.37–7.36 (m, 2H, **ArH**), 7.22–7.20 (m, 2H, **ArH**), 7.10–7.06 (m, 3H, **ArH**), 7.02–6.97 (m, 4H, **ArH**), 5.08 (m, 2H, **CH<sub>2</sub>**), 1.31 (s, 18H, **C(CH<sub>3</sub>)<sub>3</sub>**), 1.01 (s, 18H, **C(CH<sub>3</sub>)<sub>3</sub>**).

$^{13}\text{C}$  NMR (125.77 MHz, toluene- $d_8$ , 343 K):  $\delta$  166.0 (**C=N**), 161.8 (**ArC**), 149.3 (**ArC**), 141.0 (**ArC**), 139.6 (**ArC**), 138.1 (**ArC**), 130.5 (**ArCH**), 128.2 (**ArCH**), 127.3 (**ArCH**), 126.3 (**ArC**), 125.6 (**ArCH**), 125.4 (**ArCH**), 121.7 (**ArCH**), 121.0 (**ArCH**), 110.7 (**ArC**), 110.3 (**ArCH**), 66.2 (**CH<sub>2</sub>**), 35.1 (**C(CH<sub>3</sub>)<sub>3</sub>**), 34.6 (**C(CH<sub>3</sub>)<sub>3</sub>**), 31.7 (**C(CH<sub>3</sub>)<sub>3</sub>**), 29.4 (**C(CH<sub>3</sub>)<sub>3</sub>**).

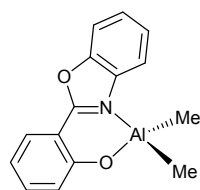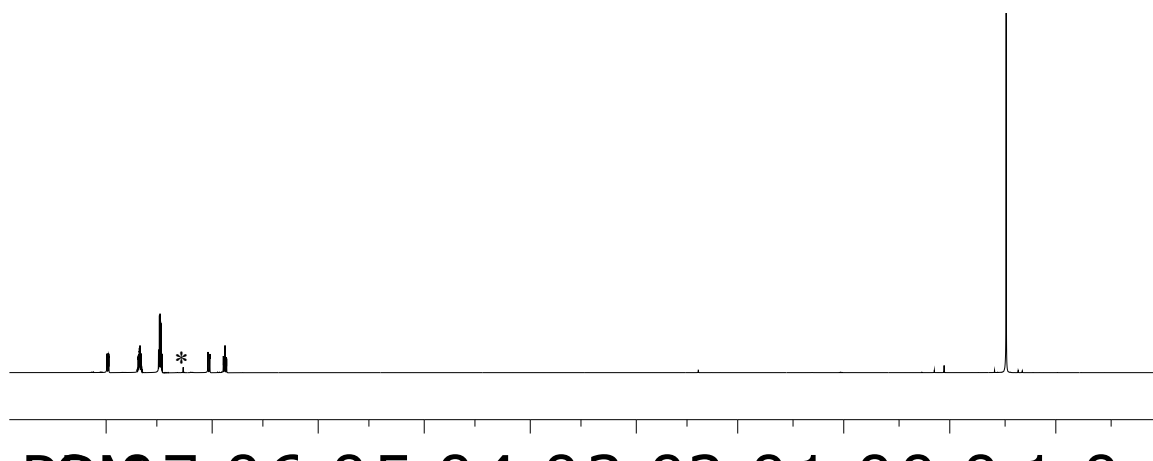

**Fig. S2**  $^1\text{H}$  NMR spectrum of **1a** in  $\text{CDCl}_3$  at 298 K (\* = solvent residue signal).

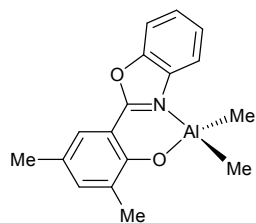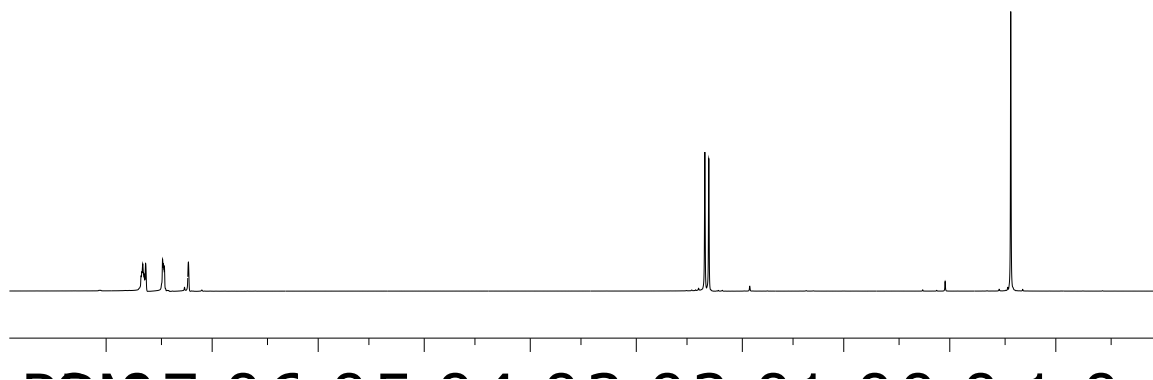

**Fig. S3**  $^1\text{H}$  NMR spectrum of **2a** in  $\text{CDCl}_3$  at 298 K.



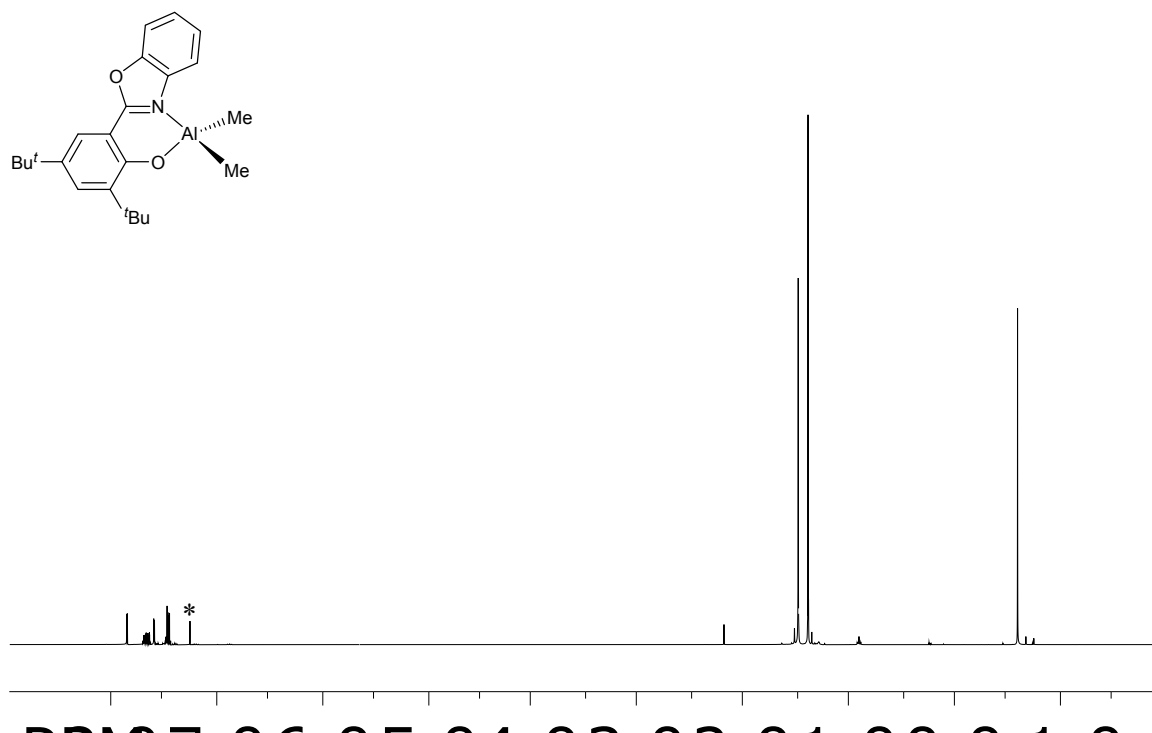

**Fig. S4** <sup>1</sup>H NMR spectrum of **3a** in CDCl<sub>3</sub> at 298 K (\* = solvent residue signal)

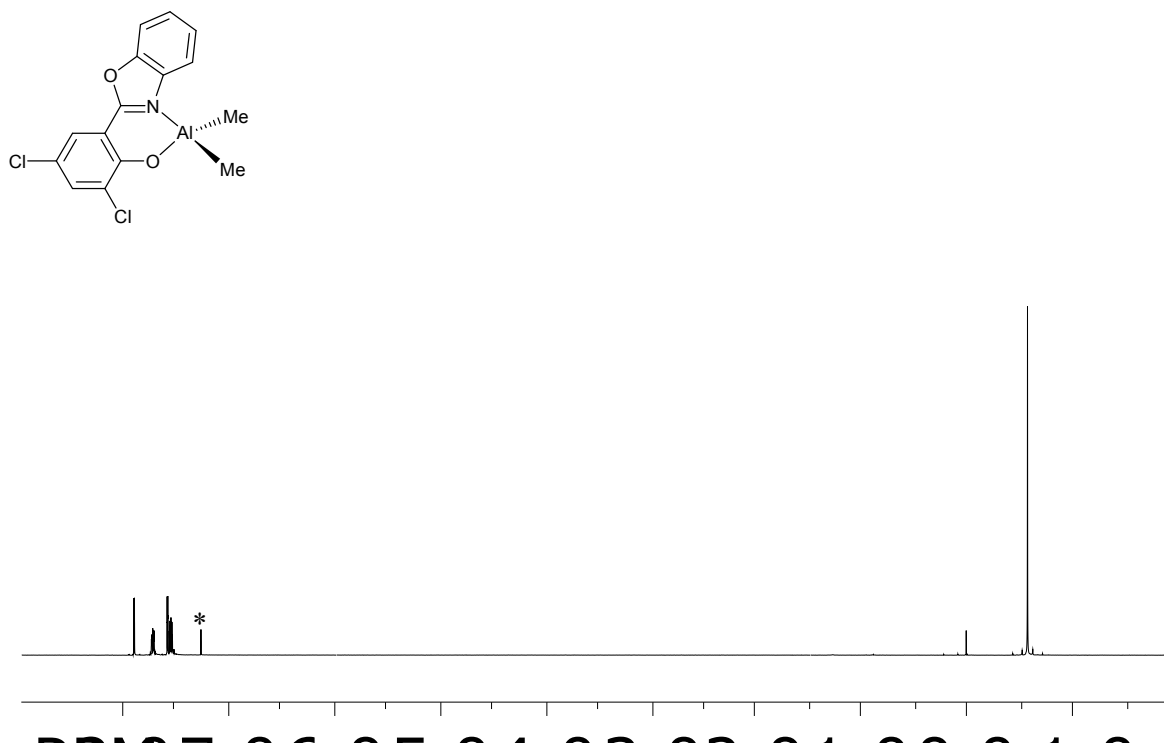

**Fig. S5** <sup>1</sup>H NMR spectrum of **4a** in CDCl<sub>3</sub> at 298 K (\* = solvent residue signal).

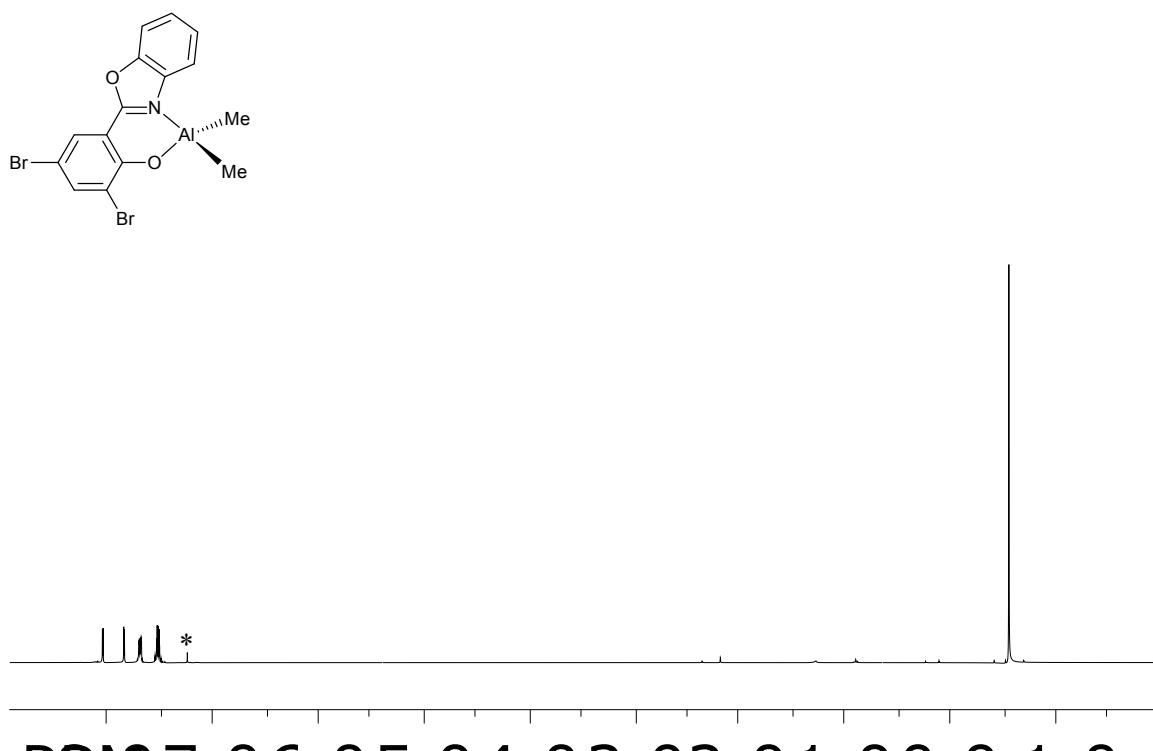

**Fig. S6** <sup>1</sup>H NMR spectrum of **5a** in CDCl<sub>3</sub> at 298 K (\* = solvent residue signal).

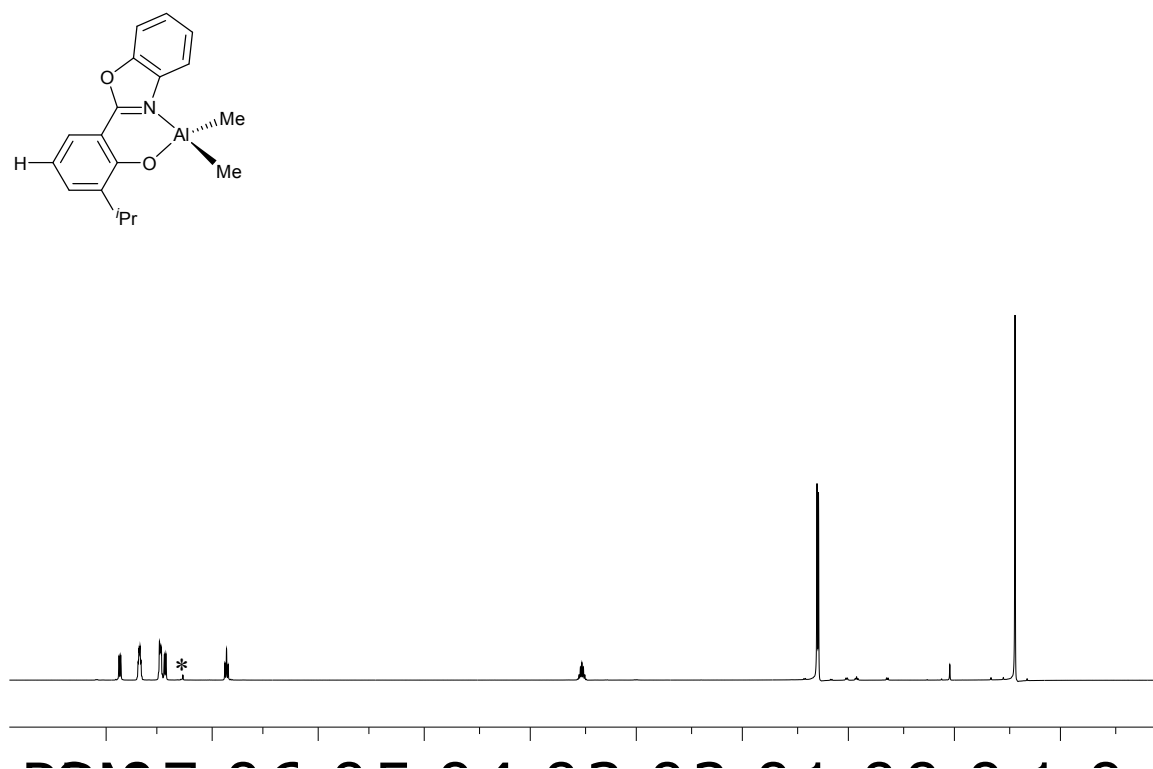

**Fig. S7** <sup>1</sup>H NMR spectrum of **6a** in CDCl<sub>3</sub> at 298 K (\* = solvent residue signal).

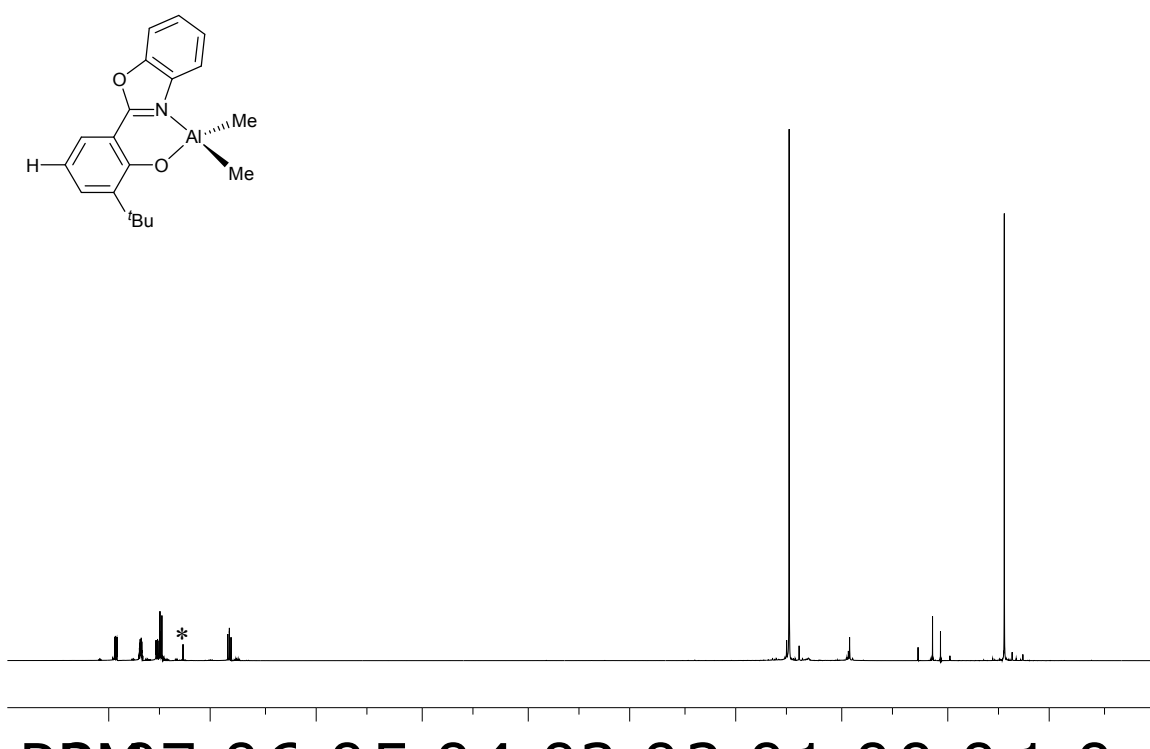

**Fig. S8** <sup>1</sup>H NMR spectrum of **7a** in CDCl<sub>3</sub> at 298 K (\* = solvent residue signal).

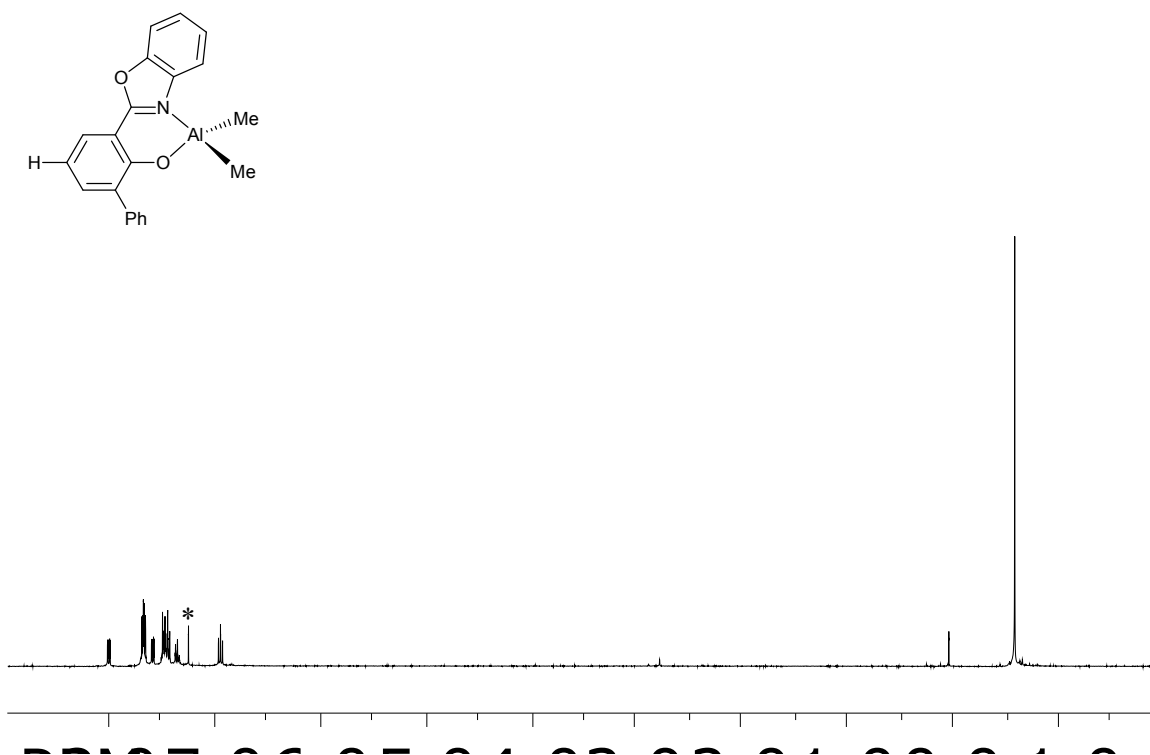

**Fig. S9.** <sup>1</sup>H NMR spectrum of **8a** in CDCl<sub>3</sub> at 298 K (\* = solvent residue signal).

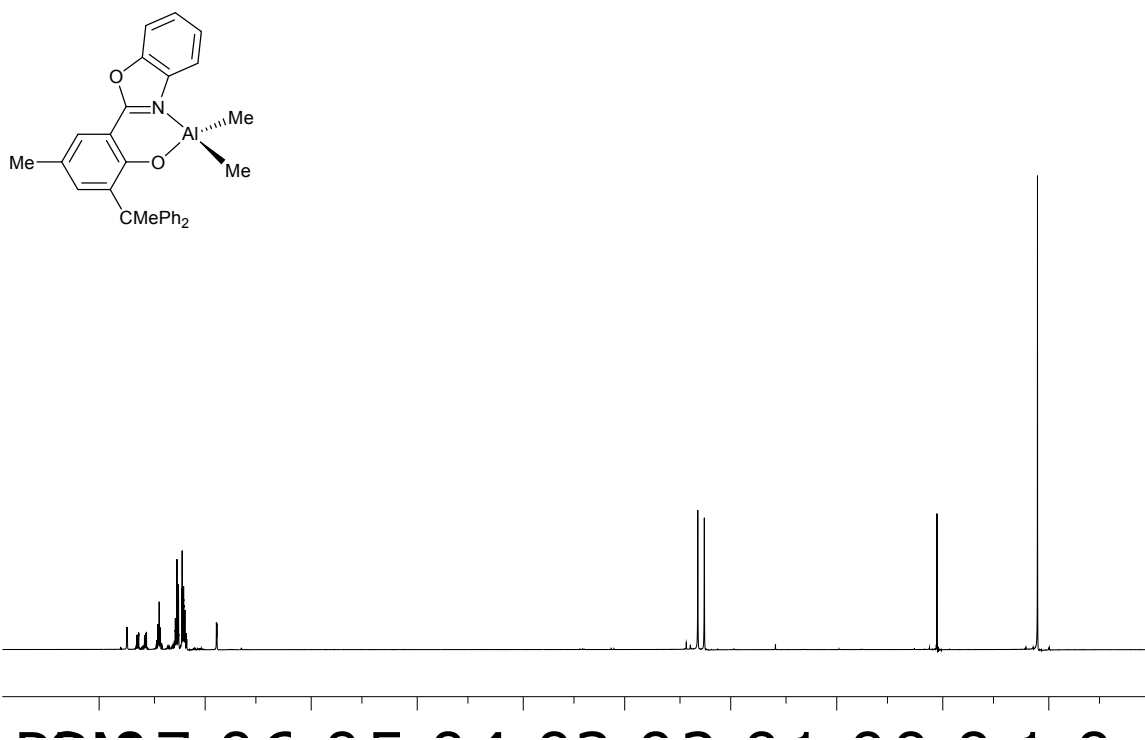

**Fig. S10**  $^1\text{H}$  NMR spectrum of **9a** in  $\text{CDCl}_3$  at 298 K.

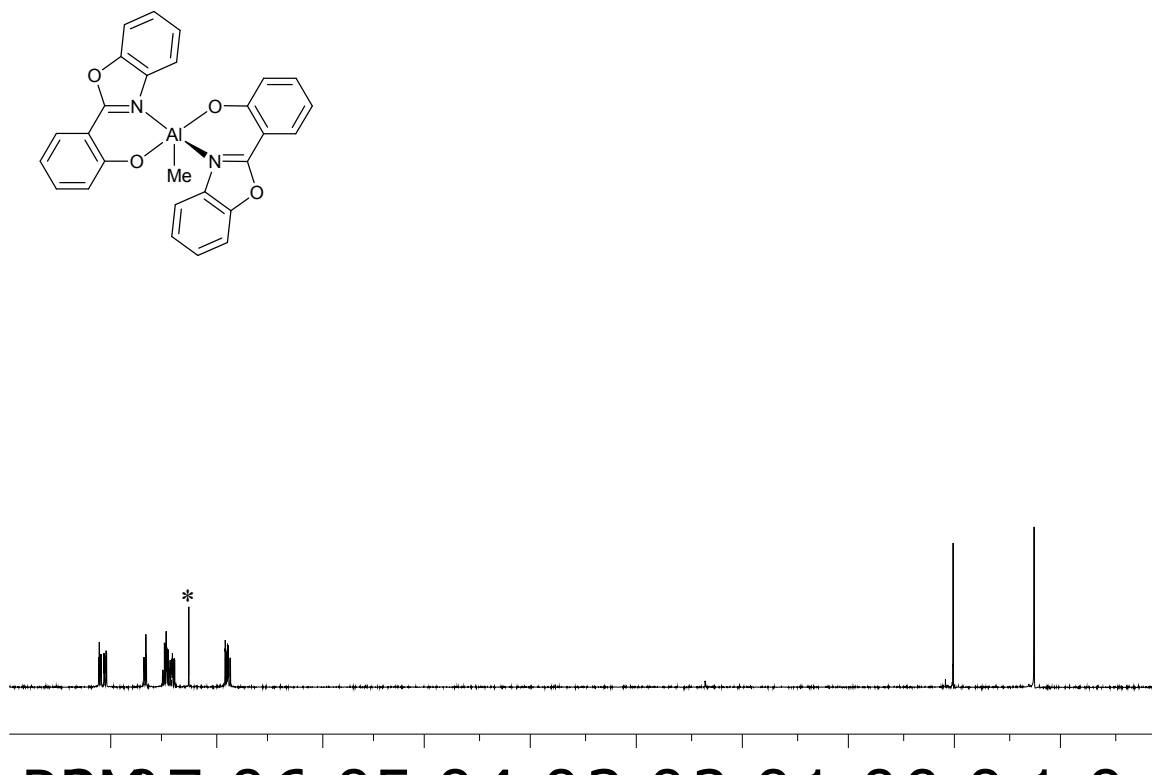

**Fig. S11**  $^1\text{H}$  NMR spectrum of **1b** in  $\text{CDCl}_3$  at 298 K (\* = solvent residue signal).

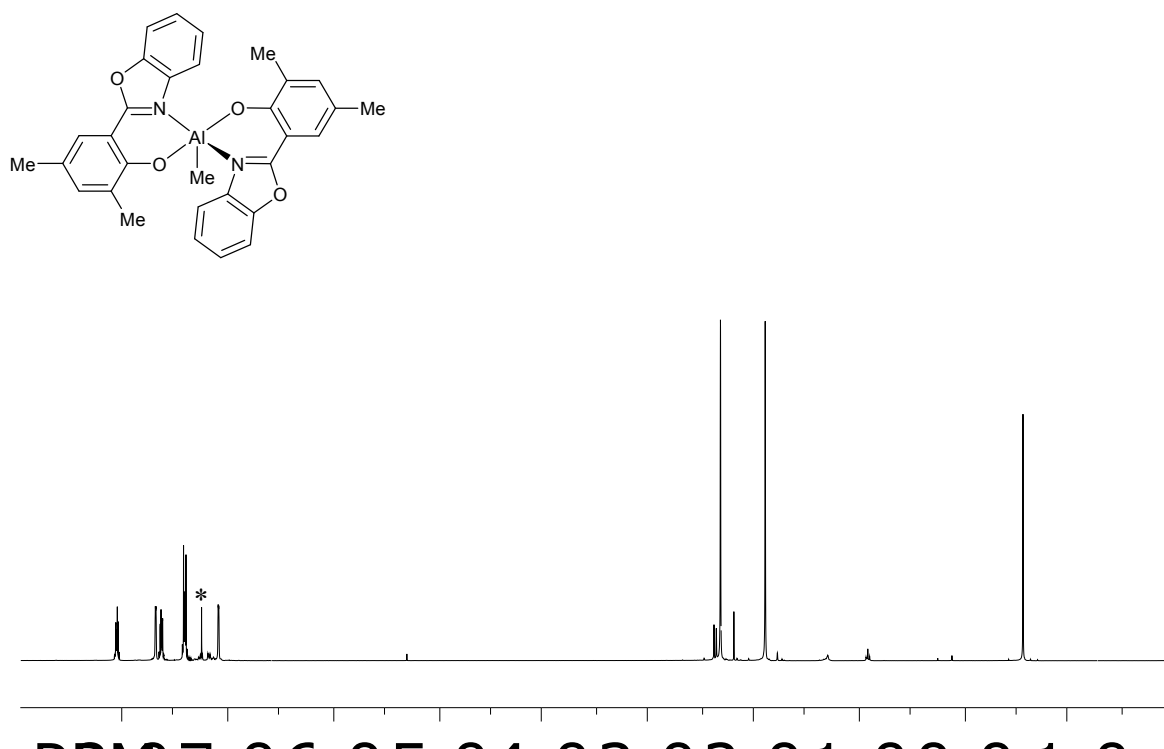

**Fig. S12**  $^1\text{H}$  NMR spectrum of **2b** in  $\text{CDCl}_3$  at 298 K (\* = solvent residue signal).

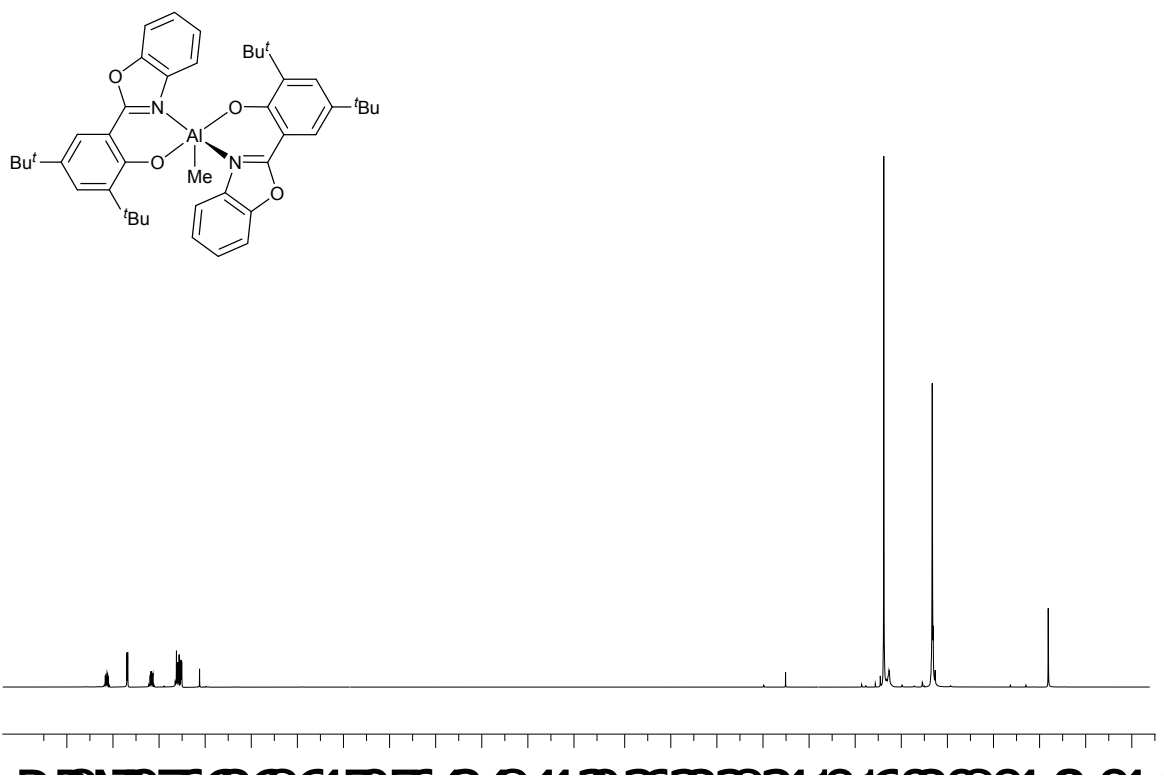

**Fig. S13**  $^1\text{H}$  NMR spectrum of **3b** in  $\text{CDCl}_3$  at 298 K.

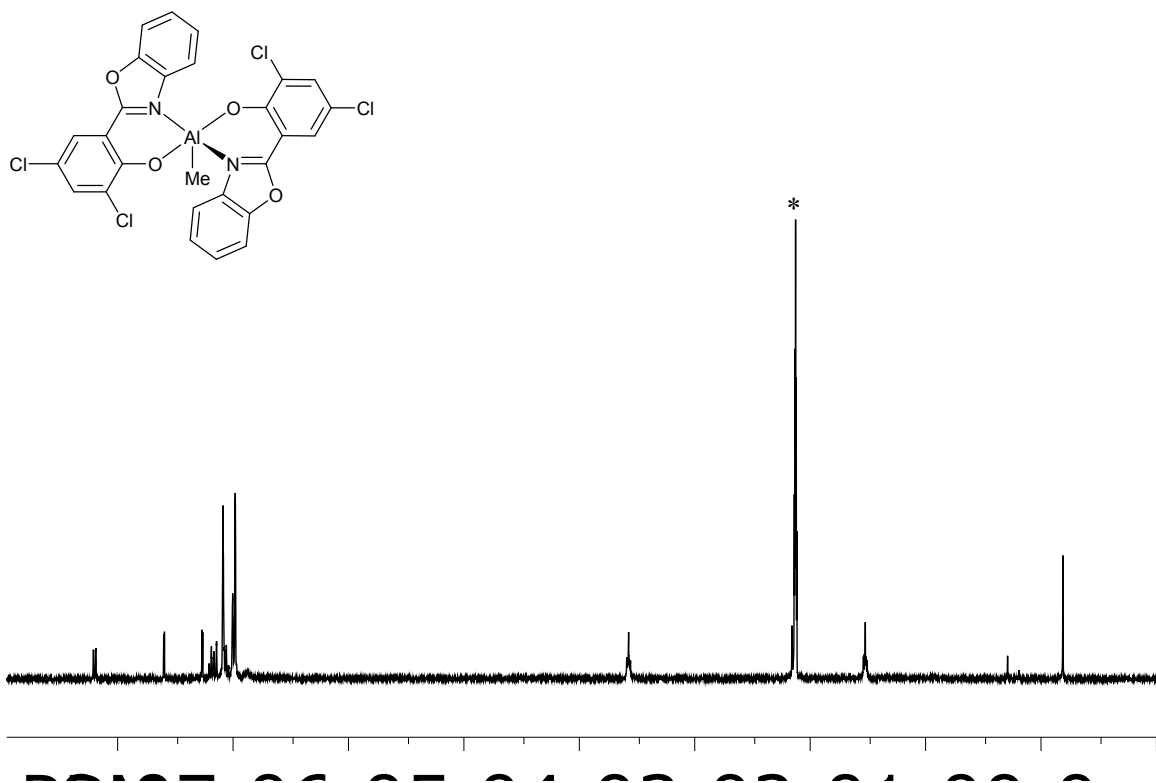

Fig. S14  $^1\text{H}$  NMR spectrum of **4b** in  $\text{toluene-}d_8$  at 343 K (\* = solvent residue signal).

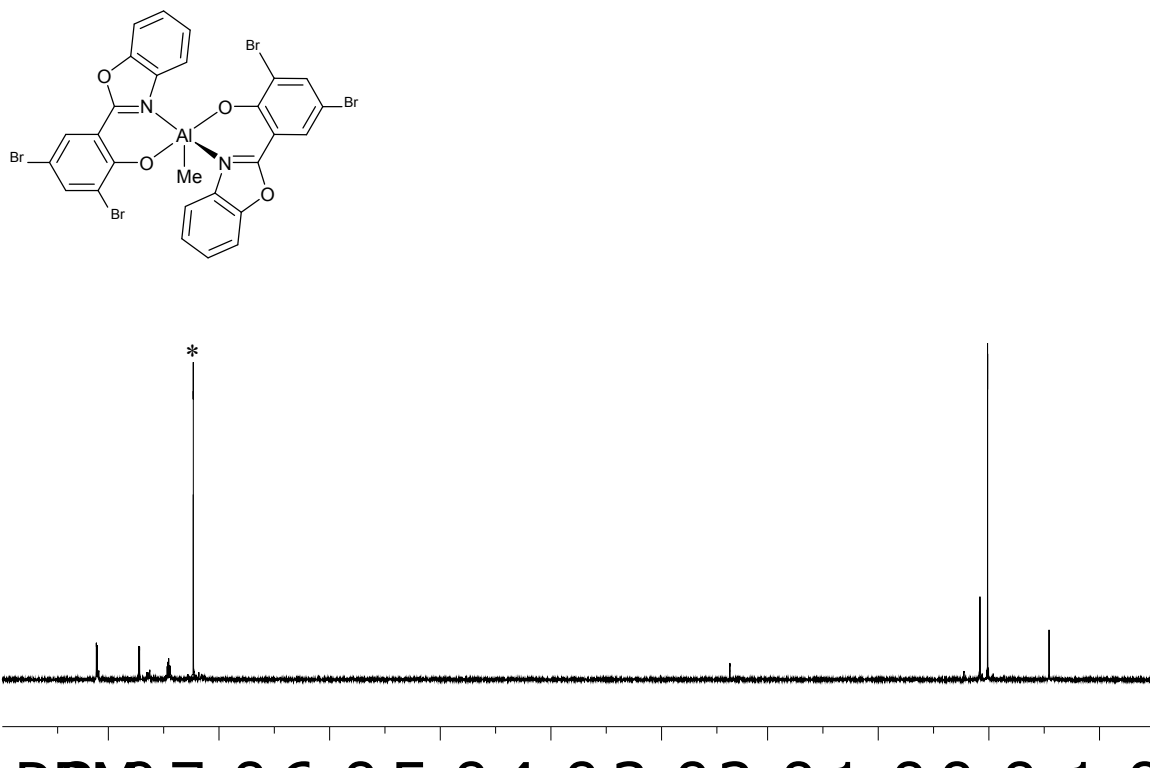

Fig. S15  $^1\text{H}$  NMR spectrum of **5b** in  $\text{CDCl}_3$  at 298 K (\* = solvent residue signal).

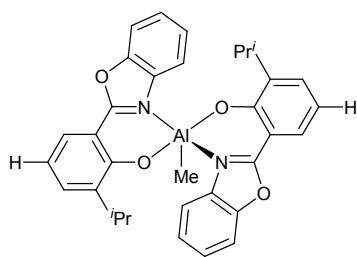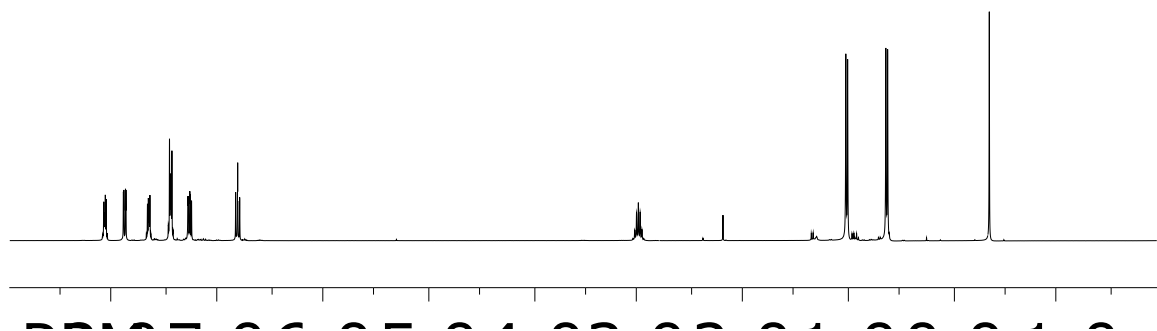

**Fig. S16** <sup>1</sup>H NMR spectrum of **6b** in CDCl<sub>3</sub> at 298 K.

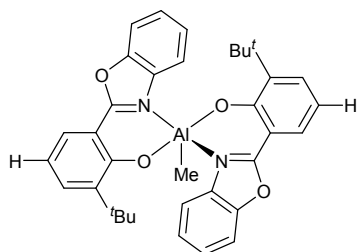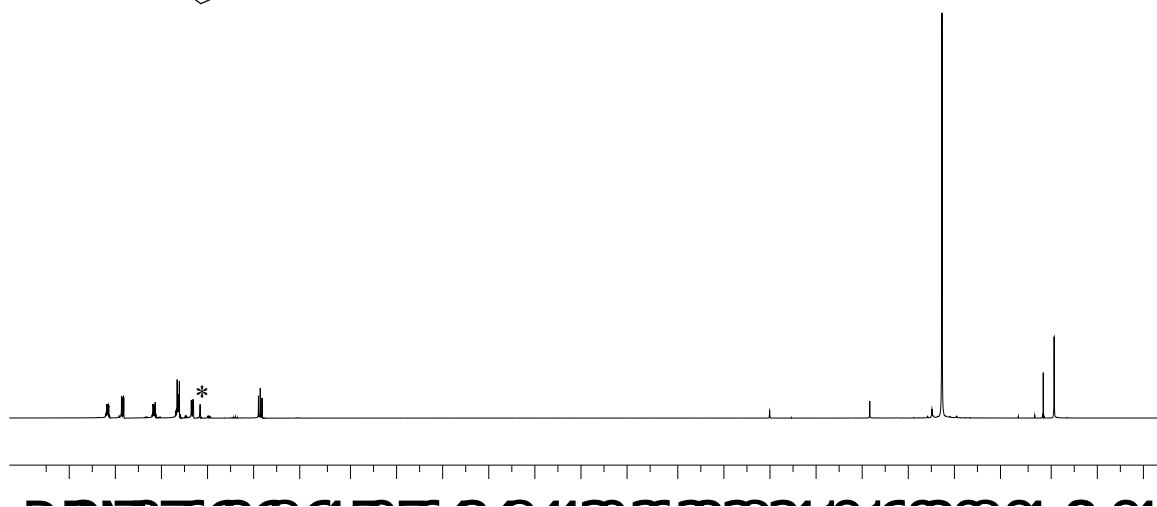

**Fig. S17** <sup>1</sup>H NMR spectrum of **7b** in CDCl<sub>3</sub> at 298 K (\* = solvent residue signal).

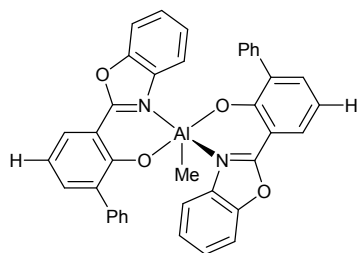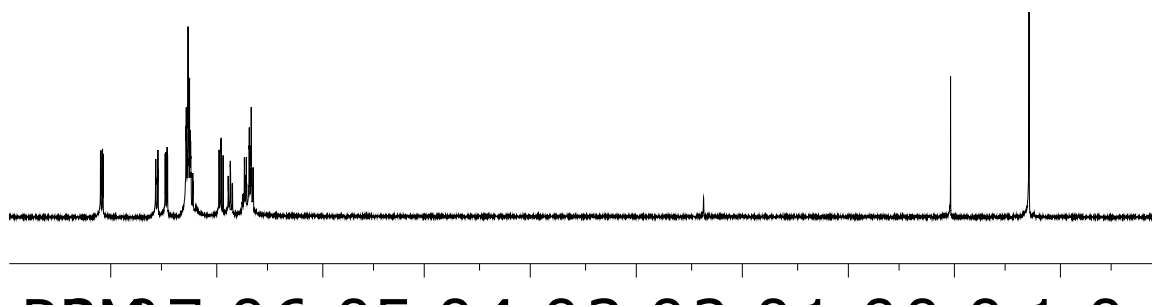

**Fig. S18**  $^1\text{H}$  NMR spectrum of **8b** in  $\text{CDCl}_3$  at 298 K.

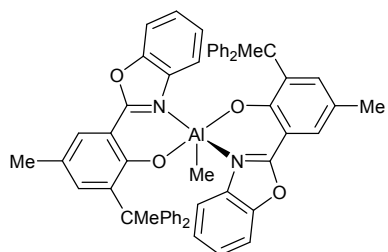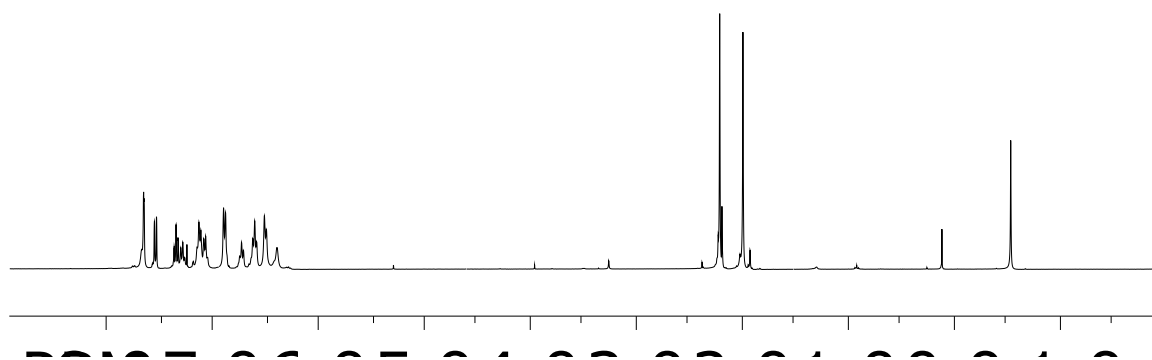

**Fig. S19**  $^1\text{H}$  NMR spectrum of **9b** in  $\text{CDCl}_3$  at 298 K.



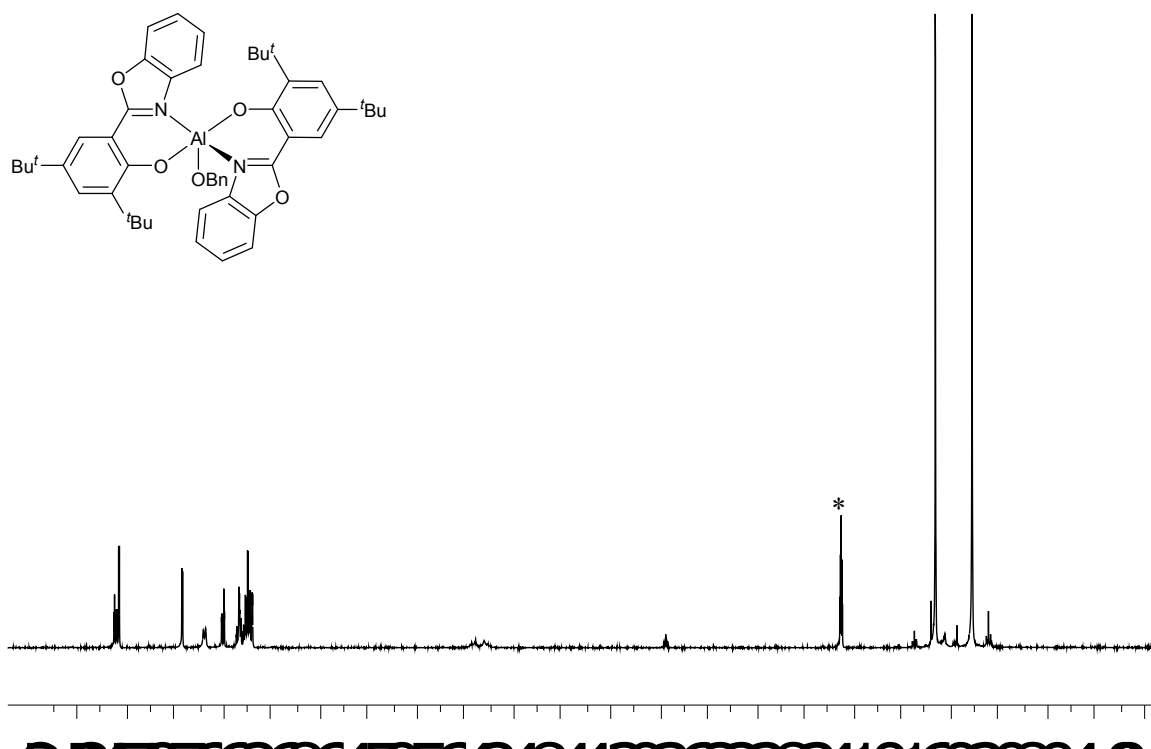

**Fig. S20** <sup>1</sup>H NMR spectrum of **10** in toluene-*d*<sub>8</sub> at 343 K (\* = solvent residue signal).

**Table S1** Crystallographic data and structure refinement details for complex **7a**.

---

|                                                         |                                                   |
|---------------------------------------------------------|---------------------------------------------------|
| Empirical formula                                       | C <sub>19</sub> H <sub>22</sub> AlNO <sub>2</sub> |
| Formula weight                                          | 323.25                                            |
| Temperature (K)                                         | 100                                               |
| Crystal size (mm)                                       | 0.180 × 0.220 × 0.260                             |
| Crystal system                                          | monoclinic                                        |
| Space group                                             | P2/c                                              |
| <i>a</i> (Å)                                            | 26.3261(13)                                       |
| <i>b</i> (Å)                                            | 10.5969(4)                                        |
| <i>c</i> (Å)                                            | 26.0751(11)                                       |
| $\alpha$ (deg)                                          | 90                                                |
| $\beta$ (deg)                                           | 105.305(2)                                        |
| $\gamma$ (deg)                                          | 90                                                |
| <i>V</i> (Å <sup>3</sup> )                              | 7016.3(5)                                         |
| <i>Z</i>                                                | 16                                                |
| Absorption coefficient (mm <sup>-1</sup> )              | 0.124                                             |
| Calculated density (mg/m <sup>3</sup> )                 | 1.224                                             |
| <i>F</i> (000)                                          | 2752                                              |
| Theta range for data collection (deg)                   | 0.80 to 25.06                                     |
| Reflections collected                                   | 34479                                             |
| Independent reflections                                 | 12422 [ <i>R</i> (int) = 0.0474]                  |
| Number of observations [ <i>I</i> > 2σ( <i>I</i> )]     | 7782                                              |
| Goodness of fit on <i>F</i> <sup>2</sup>                | 1.031                                             |
| Final <i>R</i> indices [ <i>I</i> > 2σ( <i>I</i> )]     | <i>R</i> 1 = 0.0512<br><i>wR</i> 2 = 0.1201       |
| <i>R</i> indices (all data)                             | <i>R</i> 1 = 0.0970<br><i>wR</i> 2 = 0.1431       |
| Largest difference in peak and hole (e/Å <sup>3</sup> ) | 0.28 and -0.35                                    |

---

**Table S2** Bond lengths (Å) and bond angles (°) for complex **7a**.

| <b>Bond lengths (Å)</b> |            |               |            |               |            |
|-------------------------|------------|---------------|------------|---------------|------------|
| Al1-O1                  | 1.7697(18) | C1-C2         | 1.386(3)   | C10-C11       | 1.386(4)   |
| Al1-N1                  | 1.951(2)   | C6-C1         | 1.380(3)   | C12-C11       | 1.387(3)   |
| Al1-C19                 | 1.951(3)   | C2-C3         | 1.382(4)   | C12-C13       | 1.419(3)   |
| Al1-C18                 | 1.956(3)   | C4-C3         | 1.395(4)   | C11-H11       | 0.93       |
| C13-O1                  | 1.334(3)   | C5-C4         | 1.389(4)   | C10-H10       | 0.93       |
| C7-N1                   | 1.317(3)   | C6-C5         | 1.376(3)   | C9-H9         | 0.93       |
| C8-C7                   | 1.441(3)   | C5-H5         | 0.93       | C14-C12       | 1.527(3)   |
| C13-C8                  | 1.415(3)   | C4-H4         | 0.93       | C14-C15       | 1.538(3)   |
| O2-C7                   | 1.356(3)   | C3-H3         | 0.93       | C14-C16       | 1.550(3)   |
| N1-C1                   | 1.410(3)   | C2-H2         | 0.93       | C17-C14       | 1.531(3)   |
| C8-C9                   | 1.401(3)   | C10-C9        | 1.374(3)   | C17-H17A      | 0.96       |
| C15-H15A                | 0.96       | C16-H16A      | 0.96       | C17-H17B      | 0.96       |
| C15-H15B                | 0.96       | C16-H16B      | 0.96       | C17-H17C      | 0.96       |
| C15-H15C                | 0.96       | C16-H16C      | 0.96       | C19-H19B      | 0.96       |
| C18-H18A                | 0.96       | C18-H18C      | 0.96       | C19-H19C      | 0.96       |
| C18-H18B                | 0.96       | C19-H19A      | 0.96       |               |            |
| <b>Bond angles (°)</b>  |            |               |            |               |            |
| O1-Al1-N1               | 92.08(9)   | O1-Al1-C19    | 111.99(11) | N1-Al1-C19    | 107.97(11) |
| O1-Al1-C18              | 114.56(11) | N1-Al1-C18    | 108.75(10) | C19-Al1-C18   | 118.06(12) |
| C7-O2-C6                | 105.45(18) | C9-C10-C11    | 119.5(2)   | C9-C10-H10    | 120.2      |
| C11-C10-H10             | 120.2      | C14-C17-H17A  | 109.5      | C14-C17-H17B  | 109.5      |
| H17A-C17-H17B           | 109.5      | C14-C17-H17C  | 109.5      | H17A-C17-H17C | 109.5      |
| H17B-C17-H17C           | 109.5      | C12-C14-C17   | 110.3(2)   | C12-C14-C15   | 112.0(2)   |
| C17-C14-C15             | 107.2(2)   | C12-C14-C16   | 109.5(2)   | C17-C14-C16   | 110.8(2)   |
| C15-C14-C16             | 107.0(2)   | C11-C12-C13   | 116.9(2)   | C11-C12-C14   | 122.2(2)   |
| C13-C12-C14             | 120.9(2)   | O1-C13-C8     | 120.5(2)   | C9-C8-C13     | 120.9(2)   |
| O1-C13-C12              | 120.0(2)   | C8-C13-C12    | 119.5(2)   | C9-C8-C7      | 119.0(2)   |
| C13-C8-C7               | 120.0(2)   | N1-C7-O2      | 113.3(2)   | N1-C7-C8      | 128.2(2)   |
| O2-C7-C8                | 118.4(2)   | C5-C6-C1      | 124.0(2)   | C5-C6-O2      | 128.0(2)   |
| C1-C6-O2                | 108.0(2)   | C6-C5-C4      | 115.0(2)   | C6-C5-H5      | 122.5      |
| C4-C5-H5                | 122.5      | C5-C4-C3      | 121.8(3)   | C5-C4-H4      | 119.1      |
| C3-C4-H4                | 119.1      | C14-C15-H15B  | 109.5      | C1-N1-Al1     | 131.08(16) |
| C14-C16-H16A            | 109.5      | H15A-C15-H15B | 109.5      | C6-C1-C2      | 120.8(3)   |
| C14-C16-H16B            | 109.5      | C14-C15-H15C  | 109.5      | C6-C1-N1      | 107.5(2)   |
| H16A-C16-H16B           | 109.5      | H15A-C15-H15C | 109.5      | C2-C1-N1      | 131.7(2)   |
| C14-C16-H16C            | 109.5      | H15B-C15-H15C | 109.5      | C3-C2-C1      | 116.5(2)   |
| H16A-C16-H16C           | 109.5      | C13-O1-Al1    | 135.49(16) | C3-C2-H2      | 121.8      |
| H16B-C16-H16C           | 109.5      | C7-N1-C1      | 105.8(2)   | C1-C2-H2      | 121.8      |
| C14-C15-H15A            | 109.5      | C7-N1-Al1     | 122.99(17) | C2-C3-C4      | 121.9(3)   |
| C2-C3-H3                | 119.0      | C4-C3-H3      | 119.0      | C10-C9-C8     | 119.4(2)   |
| C10-C9-H9               | 120.3      | C10-C11-H11   | 118.1      | C12-C11-H11   | 118.1      |
| Al1-C18-H18A            | 109.5      | Al1-C18-H18C  | 109.5      | H19A-C19-H19B | 109.5      |
| Al1-C18-H18B            | 109.5      | H18A-C18-H18C | 109.5      | Al1-C19-H19C  | 109.5      |
| H18A-C18-H18B           | 109.5      | H18B-C18-H18C | 109.5      | H19A-C19-H19C | 109.5      |
| Al1-C19-H19A            | 109.5      | Al1-C19-H19B  | 109.5      | H19B-C19-H19C | 109.5      |

**Table S3** Crystallographic data and structure refinement details for complex **1b**.

---

|                                                         |                                                                                                |
|---------------------------------------------------------|------------------------------------------------------------------------------------------------|
| Empirical formula                                       | C <sub>27</sub> H <sub>19</sub> AlN <sub>2</sub> O <sub>4</sub> ·C <sub>7</sub> H <sub>8</sub> |
| Formula weight                                          | 554.55                                                                                         |
| Temperature (K)                                         | 100                                                                                            |
| Crystal size (mm)                                       | 0.240 x 0.320 x 0.460                                                                          |
| Crystal system                                          | monoclinic                                                                                     |
| Space group                                             | P2 <sub>1</sub> /c                                                                             |
| <i>a</i> (Å)                                            | 12.1416(15)                                                                                    |
| <i>b</i> (Å)                                            | 21.238(2)                                                                                      |
| <i>c</i> (Å)                                            | 10.7010(11)                                                                                    |
| $\alpha$ (deg)                                          | 90                                                                                             |
| $\beta$ (deg)                                           | 93.260(4)                                                                                      |
| $\gamma$ (deg)                                          | 90                                                                                             |
| <i>V</i> (Å <sup>3</sup> )                              | 2754.9(5)                                                                                      |
| <i>Z</i>                                                | 4                                                                                              |
| Absorption coefficient (mm <sup>-1</sup> )              | 0.117                                                                                          |
| Calculated density (mg/m <sup>3</sup> )                 | 1.337                                                                                          |
| <i>F</i> (000)                                          | 1160                                                                                           |
| Theta range for data collection (deg)                   | 5.1 to 55                                                                                      |
| Reflections collected                                   | 16300                                                                                          |
| Independent reflections                                 | 6260 [ <i>R</i> (int) = 0.0459]                                                                |
| Number of observations [ $>2\sigma(I)$ ]                | 4874                                                                                           |
| Goodness of fit on <i>F</i> <sup>2</sup>                | 1.044                                                                                          |
| Final <i>R</i> indices [ $I > 2\sigma(I)$ ]             | <i>R</i> 1 = 0.0422<br><i>wR</i> 2 = 0.1058                                                    |
| <i>R</i> indices (all data)                             | <i>R</i> 1 = 0.0574<br><i>wR</i> 2 = 0.1154                                                    |
| Largest difference in peak and hole (e/Å <sup>3</sup> ) | 0.35 and -0.28                                                                                 |

---

**Table S4** Bond lengths (Å) and bond angles (°) for complex **1b**.

| <b>Bond lengths (Å)</b> |            |             |            |              |            |
|-------------------------|------------|-------------|------------|--------------|------------|
| A11-O3                  | 1.7891(12) | A11-N2      | 2.0472(12) | O2-C7        | 1.3621(17) |
| A11-O1                  | 1.7873(12) | A11-N1      | 2.0666(13) | O1-C1        | 1.3240(18) |
| A11-C27                 | 1.9574(16) | O2-C8       | 1.3804(18) | O3-C14       | 1.3272(17) |
| O3-C14                  | 1.3272(17) | O4-C21      | 1.3818(18) | N2-C7        | 1.3074(18) |
| N2-C13                  | 1.4057(19) | N1-C20      | 1.3097(18) | C24-H24      | 0.9300     |
| N1-C26                  | 1.4049(19) | C7-C6       | 1.434(2)   | C23-C22      | 1.386(2)   |
| C4-C5                   | 1.370(2)   | C4-C3       | 1.389(2)   | C16-C17      | 1.392(2)   |
| C4-H4                   | 0.9300     | C5-C6       | 1.404(2)   | C10-C9       | 1.385(2)   |
| C19-C14                 | 1.416(2)   | C6-C1       | 1.410(2)   | C10-C11      | 1.395(2)   |
| C15-C16                 | 1.378(2)   | C15-C14     | 1.398(2)   | C10-H10      | 0.9300     |
| C15-H15                 | 0.9300     | C26-C25     | 1.382(2)   | C11-C12      | 1.388(2)   |
| C26-C21                 | 1.381(2)   | C25-C24     | 1.384(2)   | C1-C2        | 1.403(2)   |
| C25-H25                 | 0.9300     | C24-C23     | 1.392(2)   | C12-C13      | 1.386(2)   |
| C12-H12                 | 0.9300     | C13-C8      | 1.385(2)   | C27-H27A     | 0.9600     |
| C8-C9                   | 1.376(2)   | C16-H16     | 0.9300     | C3-C2        | 1.375(2)   |
| C3-H3                   | 0.9300     | C17-C18     | 1.372(2)   | C20-C19      | 1.436(2)   |
| C21-C22                 | 1.381(2)   | C22-H22     | 0.9300     | C19-C18      | 1.404(2)   |
| <b>Bond angles (°)</b>  |            |             |            |              |            |
| O3-A11-O1               | 121.02(6)  | O3-A11-C27  | 119.15(7)  | C8-C9-H9     | 122.4      |
| O1-A11-C27              | 119.79(8)  | O3-A11-N2   | 85.89(5)   | C24-C23-C22  | 121.70(16) |
| O1-A11-N2               | 88.08(5)   | C27-A11-N2  | 98.15(6)   | C9-C10-C11   | 121.50(15) |
| O3-A11-N1               | 87.46(5)   | O1-A11-N1   | 85.15(5)   | C9-C10-H10   | 119.3      |
| C27-A11-N1              | 95.50(6)   | N2-A11-N1   | 166.35(5)  | C2-C3-C4     | 120.63(16) |
| C7-O2-C8                | 104.87(11) | C1-O1-A11   | 137.09(10) | C12-C11-C10  | 122.24(16) |
| C14-O3-A11              | 136.6(10)  | C20-O4-C21  | 104.90(11) | C12-C11-H11  | 118.9      |
| C7-N2-C13               | 105.48(12) | C7-N2-A11   | 125.02(10) | C2-C1-C6     | 117.91(14) |
| C13-N2-A11              | 129.43(10) | C20-N1-C26  | 105.82(12) | C13-C12-C11  | 116.48(15) |
| C20-N1-A11              | 124.98(10) | C26-N1-A11  | 129.14(10) | C13-C12-H12  | 121.8      |
| N2-C7-O2                | 113.96(13) | N2-C7-C6    | 127.58(13) | C2-C3-H3     | 119.7      |
| O2-C7-C6                | 118.45(12) | C5-C4-C3    | 119.68(15) | C12-C13-C8   | 120.15(14) |
| C5-C4-H4                | 120.2      | C3-C2-C1    | 121.12(15) | C12-C13-N2   | 132.22(14) |
| C4-C5-C6                | 120.68(16) | C4-C5-H5    | 119.7      | C8-C13-N2    | 107.59(13) |
| N1-C20-O4               | 113.51(13) | C5-C6-C1    | 119.98(14) | A11-C27-H27A | 109.5      |
| C5-C6-C7                | 120.91(14) | C1-C6-C7    | 119.09(13) | C9-C8-O2     | 127.49(14) |
| C16-C15-C14             | 120.92(14) | C16-C15-H15 | 119.5      | C9-C8-C13    | 124.39(14) |
| N1-C20-C19              | 127.40(13) | C25-C26-C21 | 120.32(15) | A11-C27-H27C | 109.5      |
| C25-C26-N1              | 132.19(14) | C21-C26-N1  | 107.48(13) | O2-C8-C13    | 108.09(12) |
| C26-C25-C24             | 117.02(15) | O4-C20-C19  | 119.09(12) | C8-C9-C10    | 115.25(15) |
| C24-C25-H25             | 121.5      | C25-C24-C23 | 121.74(16) | O1-C1-C2     | 119.11(14) |
| O4-C21-C26              | 108.30(13) | C22-C21-C26 | 123.87(15) | C18-C17-H17  | 120.1      |
| C21-C22-C23             | 115.33(15) | C21-C22-H22 | 122.3      | C17-C18-C19  | 120.44(14) |
| C23-C22-H22             | 122.3      | C18-C19-C14 | 120.00(14) | C19-C18-H18  | 119.8      |
| C18-C19-C20             | 121.07(13) | C14-C19-C20 | 118.92(13) | O3-C14-C19   | 123.04(14) |
| C15-C16-C17             | 120.69(15) | C15-C16-H16 | 119.7      | C21-C22-C23  | 115.33(15) |
| C17-C16-H16             | 119.7      | C18-C17-C16 | 119.80(15) | C18-C17-H17  | 120.1      |
| C23-C24-H24             | 119.1      | C16-C17-H17 | 120.1      | O1-C1-C6     | 122.97(14) |
| O3-C14-C15              | 118.82(13) | C17-C18-H18 | 119.8      | C15-C14-C19  | 118.13(13) |

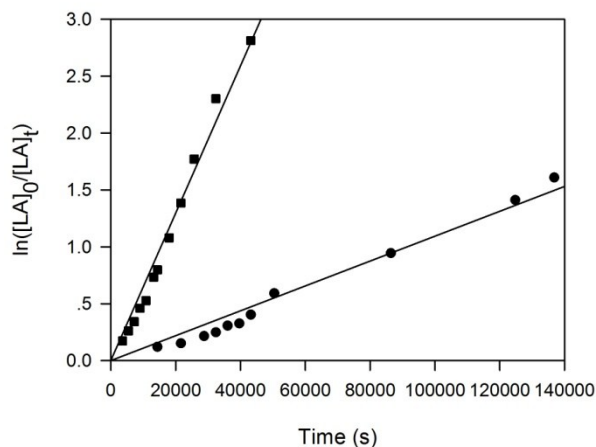

**Fig. S21** Semilogarithmic plots of *rac*-lactide conversion *versus* time in toluene at 70 °C with complexes **2a** (■) and **2b** (●) ( $[LA]_0/[Al]/[PhCH_2OH] = 50:1:1$ ,  $[LA]_0 = 0.42$  M,  $[Al] = 8.33$  mM).

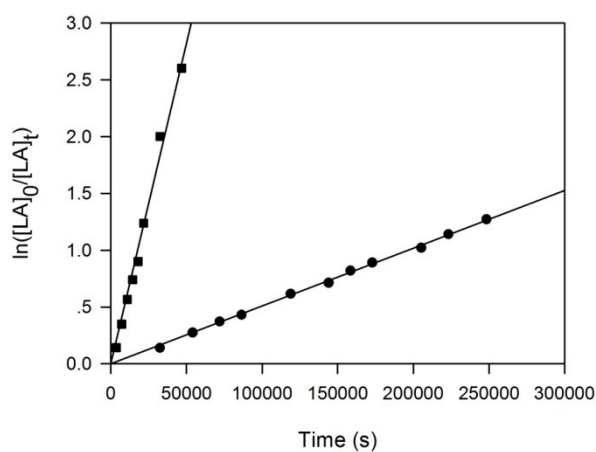

**Fig. S22** Semilogarithmic plots of *rac*-lactide conversion *versus* time in toluene at 70 °C with complexes **3a** (■) and **3b** (●) ( $[LA]_0/[Al]/[PhCH_2OH] = 50:1:1$ ,  $[LA]_0 = 0.42$  M,  $[Al] = 8.33$  mM).

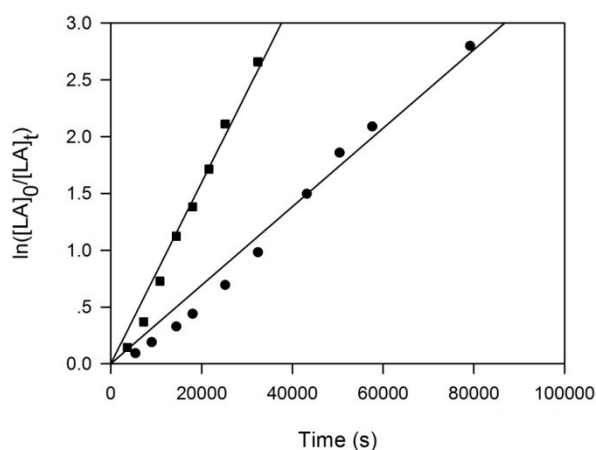

**Fig. S23** Semilogarithmic plots of *rac*-lactide conversion *versus* time in toluene at 70 °C with complexes **4a** (■) and **4b** (●) ( $[LA]_0/[Al]/[PhCH_2OH] = 50:1:1$ ,  $[LA]_0 = 0.42$  M,  $[Al] = 8.33$  mM).

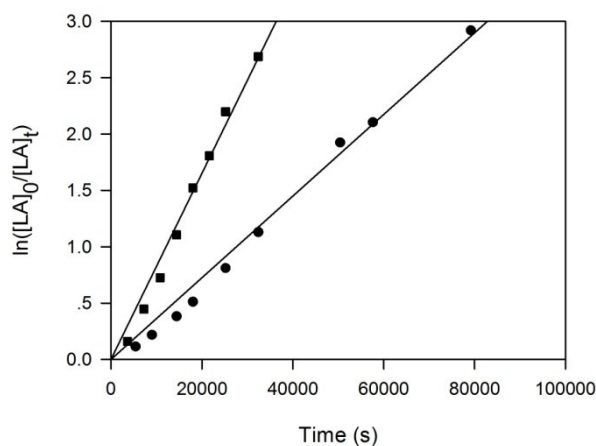

**Fig. S24** Semilogarithmic plots of *rac*-lactide conversion *versus* time in toluene at 70 °C with complexes **5a** (■) and **5b** (●) ( $[LA]_0/[Al]/[PhCH_2OH] = 50:1:1$ ,  $[LA]_0 = 0.42$  M,  $[Al] = 8.33$  mM).

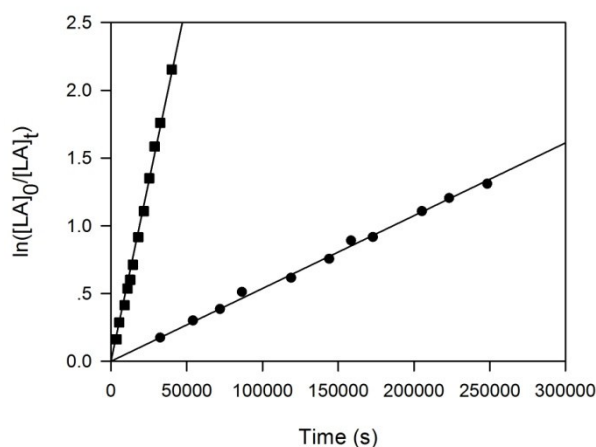

**Fig. S25** Semilogarithmic plots of *rac*-lactide conversion *versus* time in toluene at 70 °C with complexes **6a** (■) and **6b** (●) ( $[LA]_0/[Al]/[PhCH_2OH] = 50:1:1$ ,  $[LA]_0 = 0.42$  M,  $[Al] = 8.33$  mM).

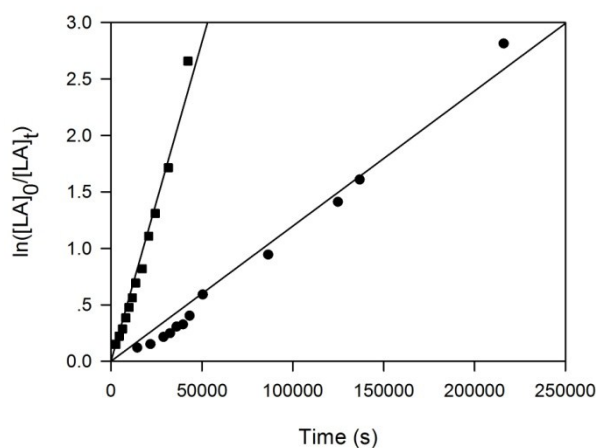

**Fig. S26** Semilogarithmic plots of *rac*-lactide conversion *versus* time in toluene at 70 °C with complexes **7a** (■) and **7b** (●) ( $[LA]_0/[Al]/[PhCH_2OH] = 50:1:1$ ,  $[LA]_0 = 0.42$  M,  $[Al] = 8.33$  mM).

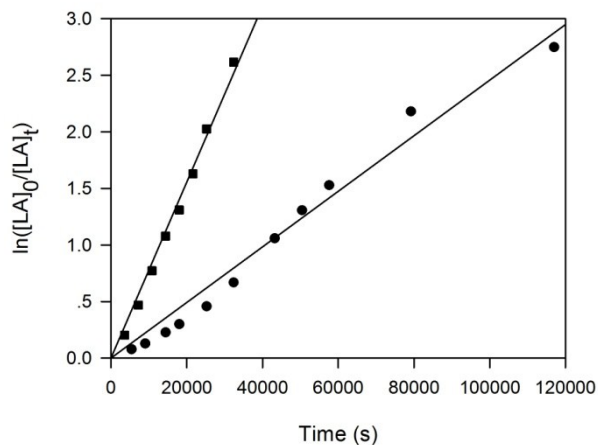

**Fig. S27** Semilogarithmic plots of *rac*-lactide conversion *versus* time in toluene at 70 °C with complexes **8a** (■) and **8b** (●) ( $[LA]_0/[Al]/[PhCH_2OH] = 50:1:1$ ,  $[LA]_0 = 0.42$  M,  $[Al] = 8.33$  mM).

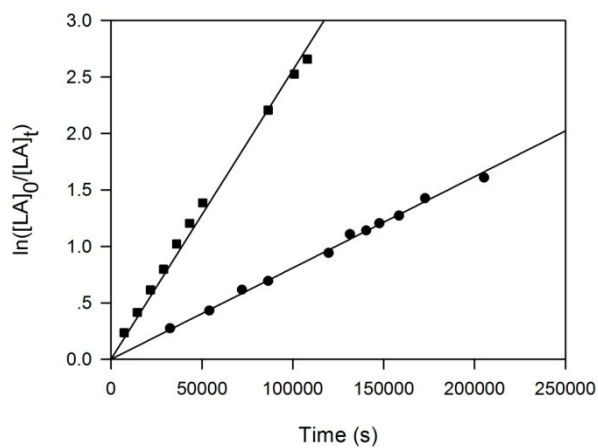

**Fig. S28** Semilogarithmic plots of *rac*-lactide conversion *versus* time in toluene at 70 °C with complexes **9a** (■) and **9b** (●) ( $[LA]_0/[Al]/[PhCH_2OH] = 50:1:1$ ,  $[LA]_0 = 0.42$  M,  $[Al] = 8.33$  mM).



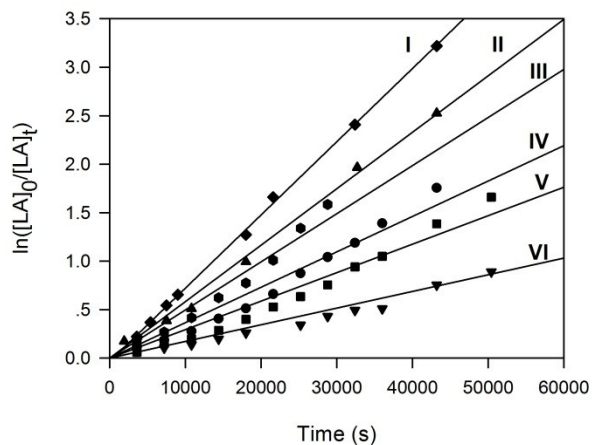

**Fig. S29** Semilogarithmic plots of the *rac*-lactide conversion *versus* time in toluene at 70 °C with complex **1b**/PhCH<sub>2</sub>OH as an initiator ( $[LA]_0 = 0.42$  M: **I**,  $[Al] = 33.32$  mM,  $[LA]_0/[Al] = 13$ ; **II**,  $[Al] = 24.99$  mM,  $[LA]_0/[Al] = 17$ ; **III**,  $[Al] = 20.82$  mM,  $[LA]_0/[Al] = 20$ ; **IV**,  $[Al] = 16.66$  mM,  $[LA]_0/[Al] = 25$ ; **V**,  $[Al] = 12.50$  mM,  $[LA]_0/[Al] = 34$ ; **VI**,  $[Al] = 8.33$  mM,  $[LA]_0/[Al] = 50$ ).

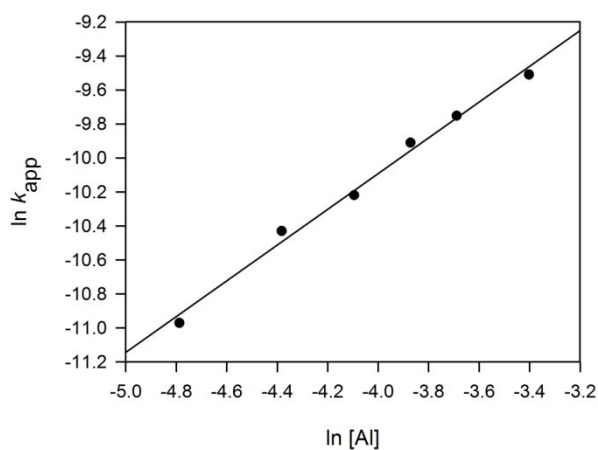

**Fig. S30** Plot of  $\ln k_{app}$  *versus*  $\ln [Al]$  for the polymerization of *rac*-lactide with complex **1b**/PhCH<sub>2</sub>OH as an initiator (toluene, 70 °C,  $[LA]_0 = 0.42$  M).

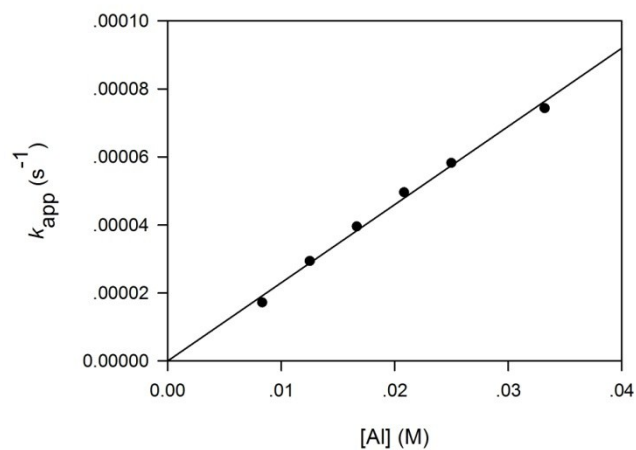

**Fig. S31** Plot of  $k_{app}$  versus  $[AI]$  for the polymerization of *rac*-lactide with complex **1b**/PhCH<sub>2</sub>OH as an initiator (toluene, 70 °C,  $[LA]_0 = 0.42$  M).

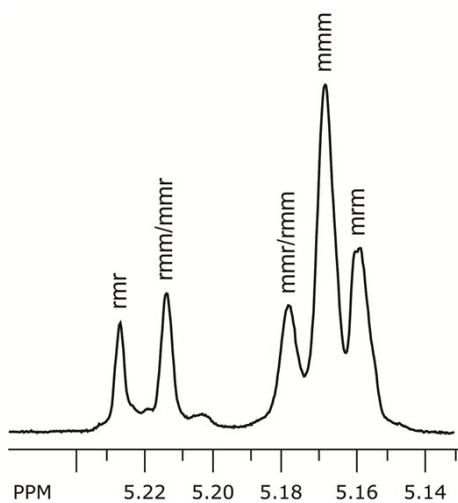

**Fig. S32** Homonuclear decoupled <sup>1</sup>H NMR spectrum of the methine region of PLA prepared from *rac*-lactide at 70 °C in toluene (500 MHz, CDCl<sub>3</sub>) with **1a**/PhCH<sub>2</sub>OH.

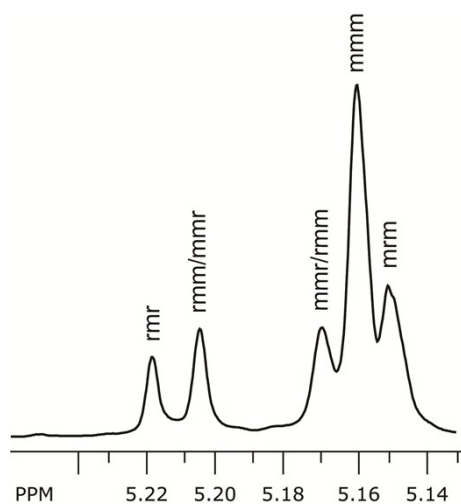

**Fig. S33** Homonuclear decoupled  $^1\text{H}$  NMR spectrum of the methine region of PLA prepared from *rac*-lactide at 70 °C in toluene (500 MHz,  $\text{CDCl}_3$ ) with **1b**/PhCH<sub>2</sub>OH.

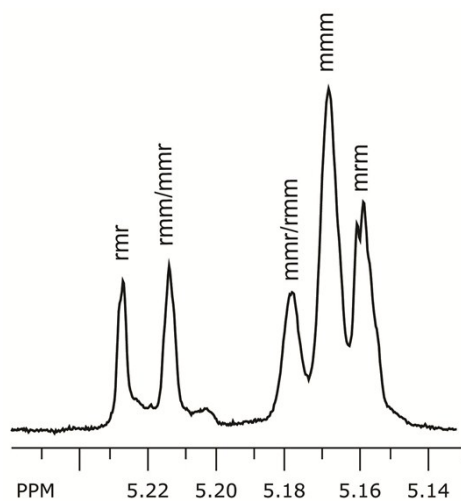

**Fig. S34** Homonuclear decoupled  $^1\text{H}$  NMR spectrum of the methine region of PLA prepared from *rac*-lactide at 70 °C in toluene (500 MHz,  $\text{CDCl}_3$ ) with **2a**/PhCH<sub>2</sub>OH.

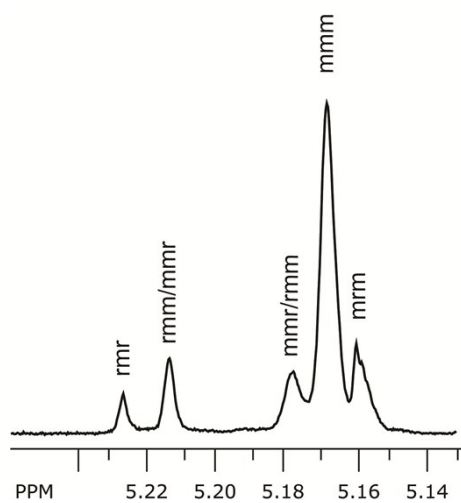

**Fig. S35** Homonuclear decoupled  $^1\text{H}$  NMR spectrum of the methine region of PLA prepared from *rac*-lactide at 70 °C in toluene (500 MHz,  $\text{CDCl}_3$ ) with **2b**/PhCH<sub>2</sub>OH.

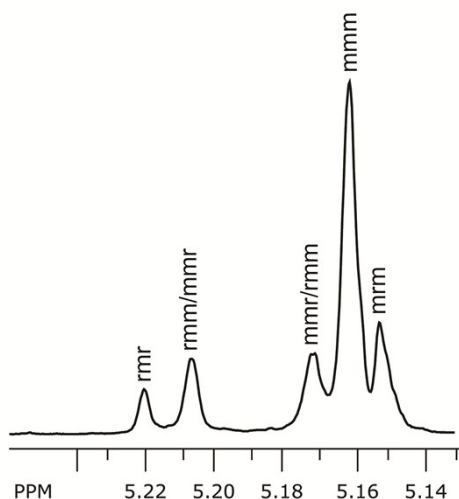

**Fig. S36** Homonuclear decoupled  $^1\text{H}$  NMR spectrum of the methine region of PLA prepared from *rac*-lactide at 70 °C in toluene (500 MHz,  $\text{CDCl}_3$ ) with **3a**/ $\text{PhCH}_2\text{OH}$ .

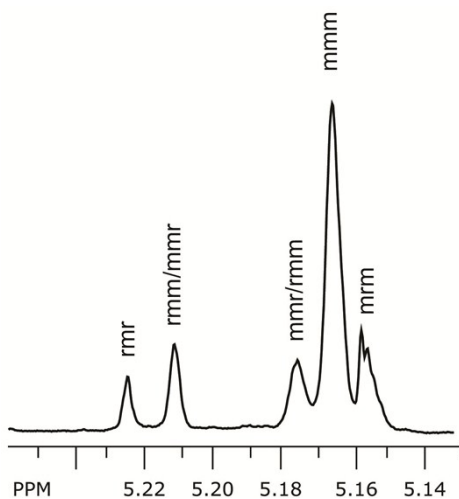

**Fig. S37** Homonuclear decoupled  $^1\text{H}$  NMR spectrum of the methine region of PLA prepared from *rac*-lactide at 70 °C in toluene (500 MHz,  $\text{CDCl}_3$ ) with **3b**/ $\text{PhCH}_2\text{OH}$ .

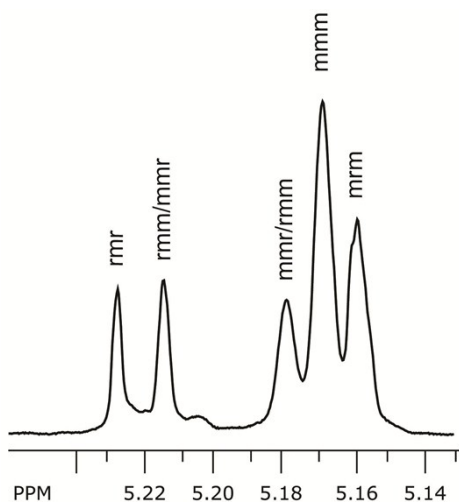

**Fig. S38** Homonuclear decoupled  $^1\text{H}$  NMR spectrum of the methine region of PLA prepared from *rac*-lactide at 70 °C in toluene (500 MHz,  $\text{CDCl}_3$ ) with **4a**/ $\text{PhCH}_2\text{OH}$ .

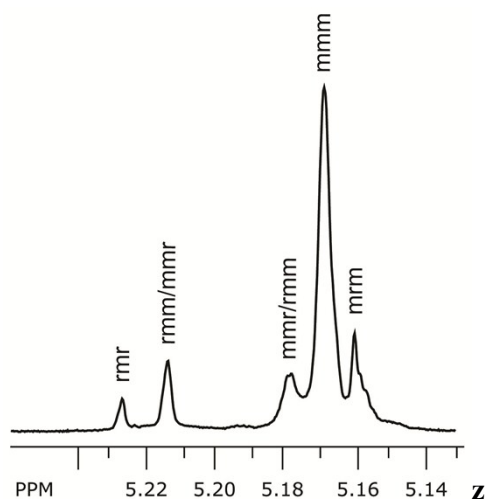

**Fig. S39** Homonuclear decoupled  $^1\text{H}$  NMR spectrum of the methine region of PLA prepared from *rac*-lactide at 70 °C in toluene (500 MHz,  $\text{CDCl}_3$ ) with **4b**/ $\text{PhCH}_2\text{OH}$ .

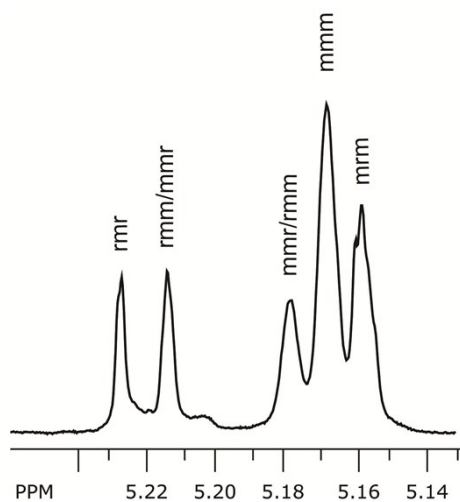

**Fig. S40** Homonuclear decoupled  $^1\text{H}$  NMR spectrum of the methine region of PLA prepared from *rac*-lactide at 70 °C in toluene (500 MHz,  $\text{CDCl}_3$ ) with **5a**/ $\text{PhCH}_2\text{OH}$ .

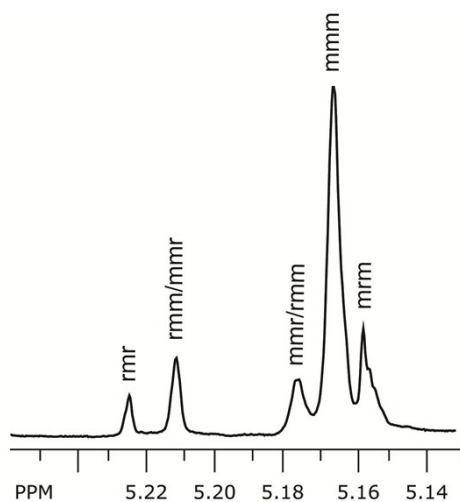

**Fig. S41** Homonuclear decoupled  $^1\text{H}$  NMR spectrum of the methine region of PLA prepared from *rac*-lactide at 70 °C in toluene (500 MHz,  $\text{CDCl}_3$ ) with **5b**/ $\text{PhCH}_2\text{OH}$ .

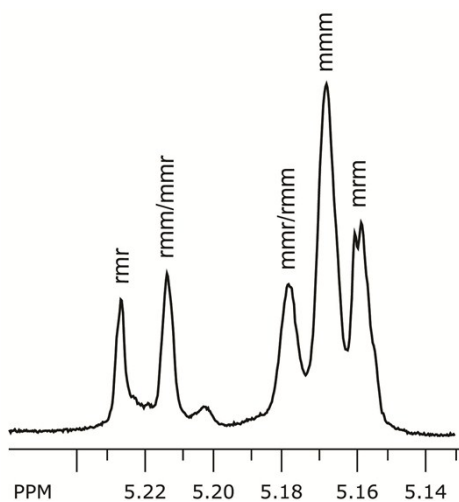

**Fig. S42** Homonuclear decoupled  $^1\text{H}$  NMR spectrum of the methine region of PLA prepared from *rac*-lactide at 70 °C in toluene (500 MHz,  $\text{CDCl}_3$ ) with **6a**/ $\text{PhCH}_2\text{OH}$ .

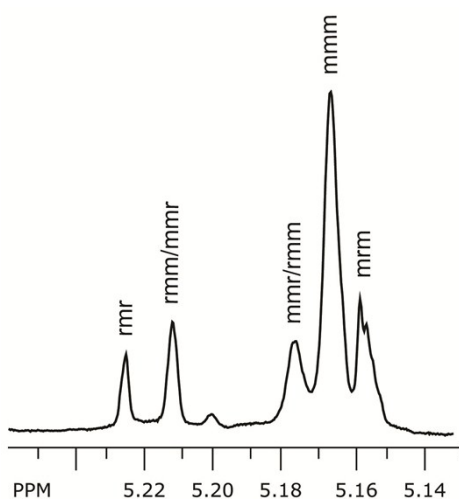

**Fig. S43** Homonuclear decoupled  $^1\text{H}$  NMR spectrum of the methine region of PLA prepared from *rac*-lactide at 70 °C in toluene (500 MHz,  $\text{CDCl}_3$ ) with **6b**/ $\text{PhCH}_2\text{OH}$ .

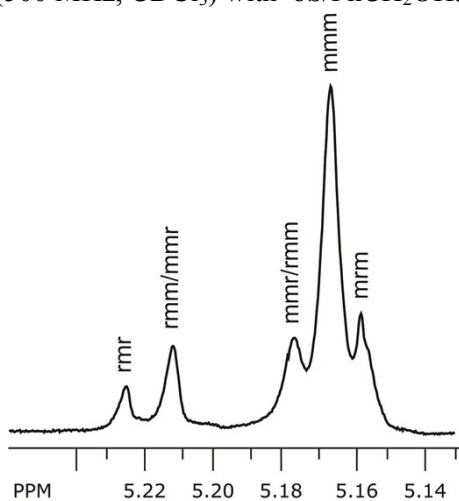

**Fig. S44** Homonuclear decoupled  $^1\text{H}$  NMR spectrum of the methine region of PLA prepared from *rac*-lactide at 70 °C in toluene (500 MHz,  $\text{CDCl}_3$ ) with **7a**/ $\text{PhCH}_2\text{OH}$ .

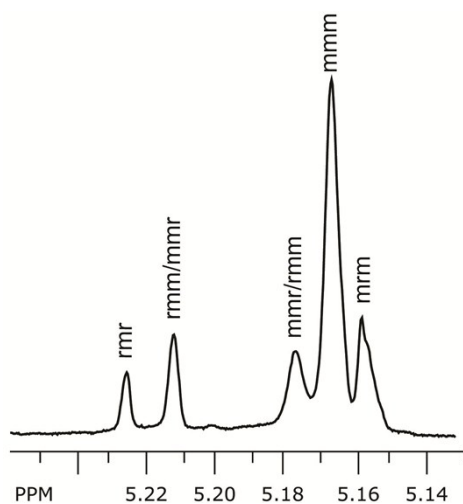

**Fig. S45** Homonuclear decoupled  $^1\text{H}$  NMR spectrum of the methine region of PLA prepared from *rac*-lactide at 70 °C in toluene (500 MHz,  $\text{CDCl}_3$ ) with **7b**/PhCH<sub>2</sub>OH.

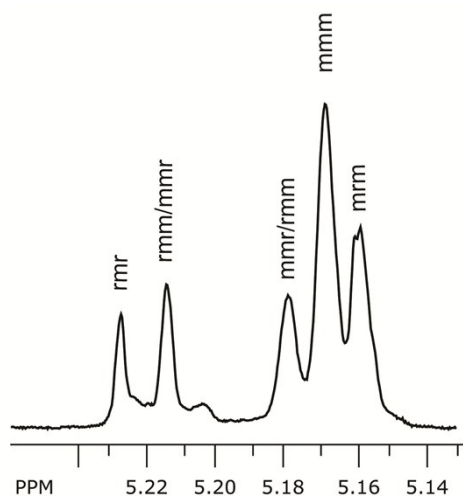

**Fig. S46** Homonuclear decoupled  $^1\text{H}$  NMR spectrum of the methine region of PLA prepared from *rac*-lactide at 70 °C in toluene (500 MHz,  $\text{CDCl}_3$ ) with **8a**/PhCH<sub>2</sub>OH.

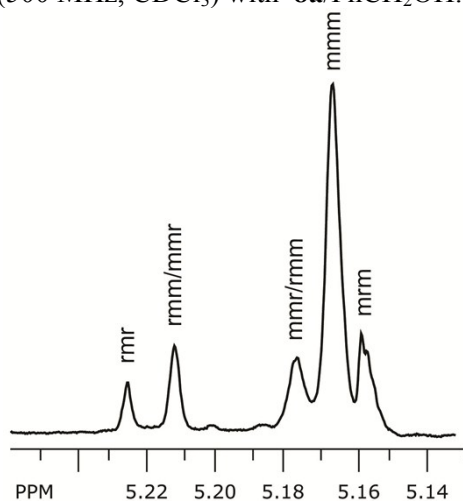

**Fig. S47** Homonuclear decoupled  $^1\text{H}$  NMR spectrum of the methine region of PLA prepared from *rac*-lactide at 70 °C in toluene (500 MHz,  $\text{CDCl}_3$ ) with **8b**/PhCH<sub>2</sub>OH.

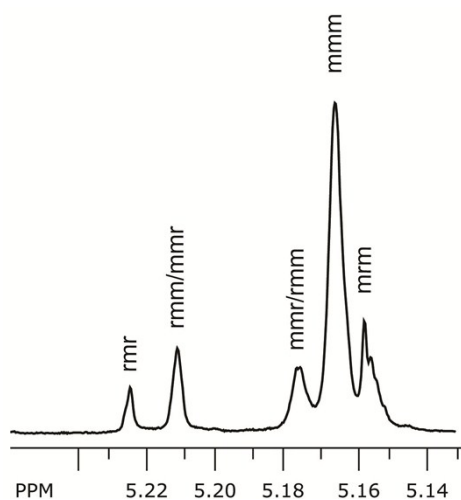

**Fig. S48** Homonuclear decoupled  $^1\text{H}$  NMR spectrum of the methine region of PLA prepared from *rac*-lactide at 70 °C in toluene (500 MHz,  $\text{CDCl}_3$ ) with **9a**/ $\text{PhCH}_2\text{OH}$ .

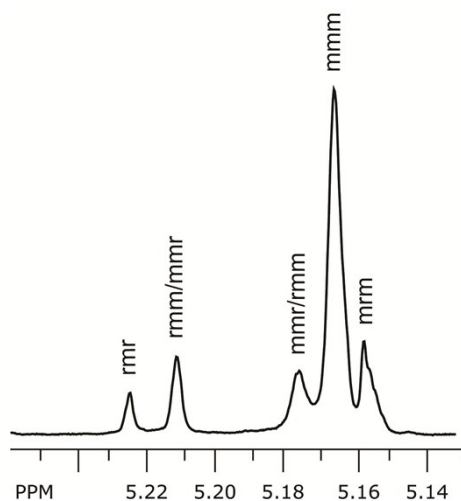

**Fig. S49** Homonuclear decoupled  $^1\text{H}$  NMR spectrum of the methine region of PLA prepared from *rac*-lactide at 70 °C in toluene (500 MHz,  $\text{CDCl}_3$ ) with **9b**/ $\text{PhCH}_2\text{OH}$ .

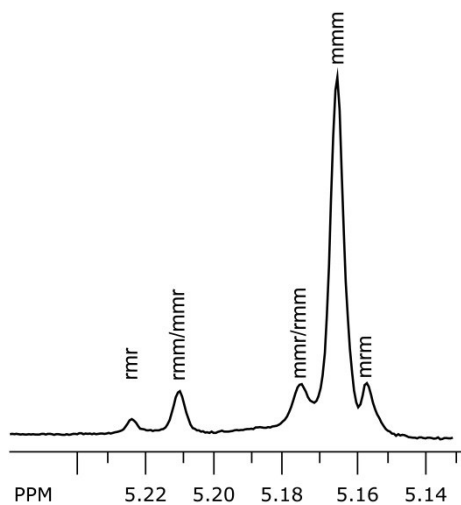

**Fig. S50** Homonuclear decoupled  $^1\text{H}$  NMR spectrum of the methine region of PLA prepared from *rac*-lactide at 50 °C in toluene (500 MHz,  $\text{CDCl}_3$ ) with **4b**/ $\text{PhCH}_2\text{OH}$ .



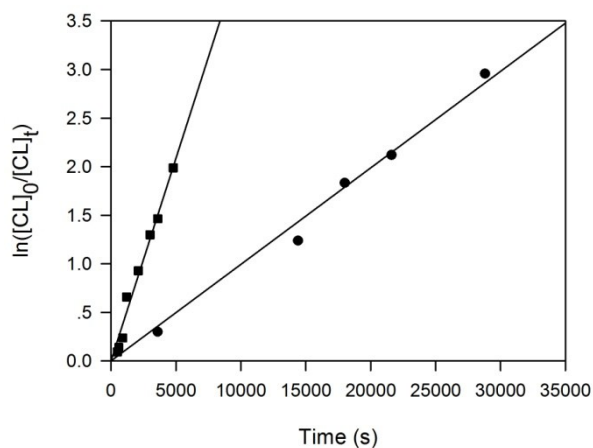

**Fig. S51** Semilogarithmic plots of  $\varepsilon$ -CL conversion versus time in  $C_6D_6$  at 40 °C with complexes **2a** (■) and **2b** (●) ( $[\varepsilon\text{-CL}]_0/[\text{Al}] = 50$ ,  $[\text{Al}]/[\text{PhCH}_2\text{OH}] = 1$ ,  $[\varepsilon\text{-CL}]_0 = 0.83$  M,  $[\text{Al}] = 16.67$  mM).

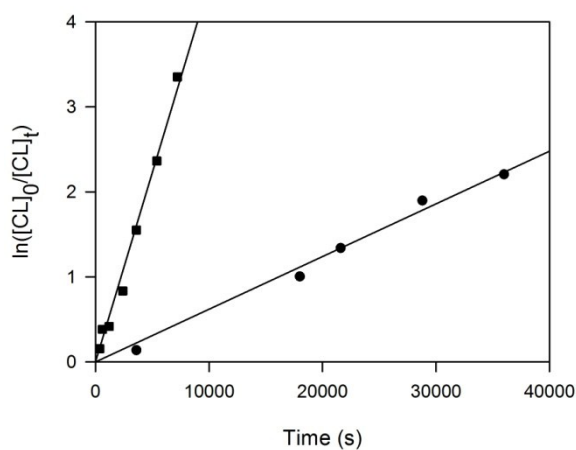

**Fig. S52** Semilogarithmic plots of  $\varepsilon$ -CL conversion versus time in  $C_6D_6$  at 40 °C with complexes **3a** (■) and **3b** (●) ( $[\varepsilon\text{-CL}]_0/[\text{Al}] = 50$ ,  $[\text{Al}]/[\text{PhCH}_2\text{OH}] = 1$ ,  $[\varepsilon\text{-CL}]_0 = 0.83$  M,  $[\text{Al}] = 16.67$  mM).

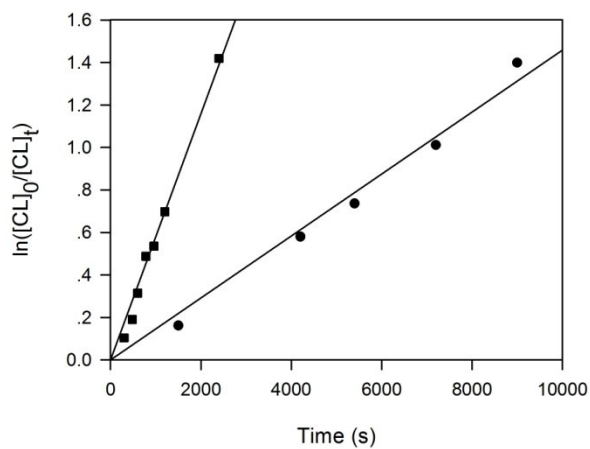

**Fig. S53** Semilogarithmic plots of  $\varepsilon$ -CL conversion versus time in  $C_6D_6$  at 40 °C with complexes **4a** (■) and **4b** (●) ( $[\varepsilon\text{-CL}]_0/[\text{Al}] = 50$ ,  $[\text{Al}]/[\text{PhCH}_2\text{OH}] = 1$ ,  $[\varepsilon\text{-CL}]_0 = 0.83$  M,  $[\text{Al}] = 16.67$  mM).

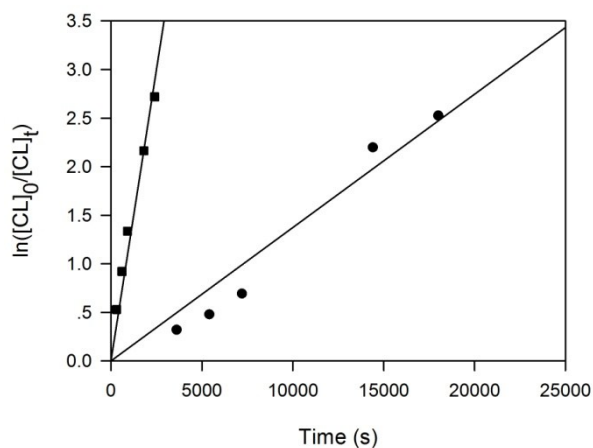

**Fig. S54** Semilogarithmic plots of  $\varepsilon$ -CL conversion versus time in  $C_6D_6$  at 40 °C with complexes **5a** (■) and **5b** (●) ( $[\varepsilon\text{-CL}]_0/[\text{Al}] = 50$ ,  $[\text{Al}]/[\text{PhCH}_2\text{OH}] = 1$ ,  $[\varepsilon\text{-CL}]_0 = 0.83$  M,  $[\text{Al}] = 16.67$  mM).

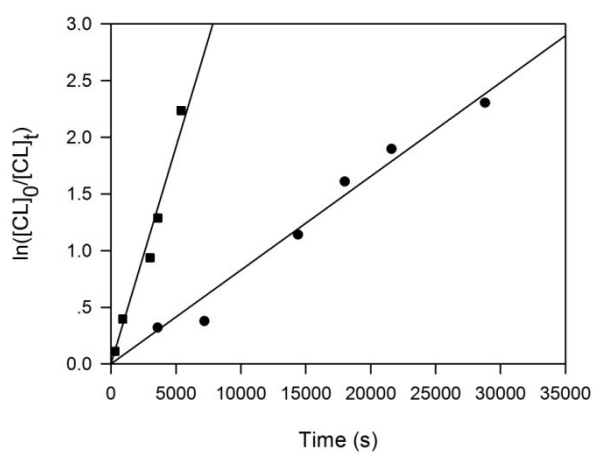

**Fig. S55** Semilogarithmic plots of  $\varepsilon$ -CL conversion versus time in  $C_6D_6$  at 40 °C with complexes **6a** (■) and **6b** (●) ( $[\varepsilon\text{-CL}]_0/[\text{Al}] = 50$ ,  $[\text{Al}]/[\text{PhCH}_2\text{OH}] = 1$ ,  $[\varepsilon\text{-CL}]_0 = 0.83$  M,  $[\text{Al}] = 16.67$  mM).

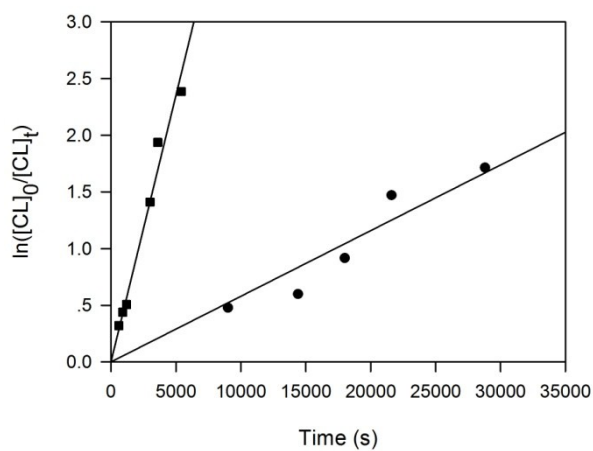

**Fig. S56** Semilogarithmic plots of  $\varepsilon$ -CL conversion versus time in  $C_6D_6$  at 40 °C with complexes **7a** (■) and **7b** (●) ( $[\varepsilon\text{-CL}]_0/[\text{Al}] = 50$ ,  $[\text{Al}]/[\text{PhCH}_2\text{OH}] = 1$ ,  $[\varepsilon\text{-CL}]_0 = 0.83$  M,  $[\text{Al}] = 16.67$  mM).

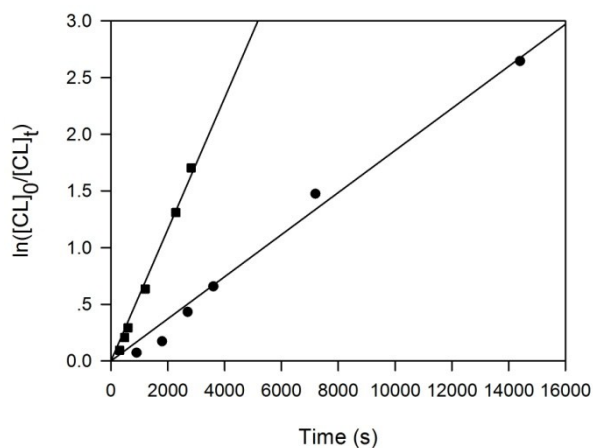

**Fig. S57** Semilogarithmic plots of  $\epsilon$ -CL conversion versus time in  $C_6D_6$  at 40 °C with complexes **8a** (■) and **8b** (●) ( $[\epsilon\text{-CL}]_0/[\text{Al}] = 50$ ,  $[\text{Al}]/[\text{PhCH}_2\text{OH}] = 1$ ,  $[\epsilon\text{-CL}]_0 = 0.83$  M,  $[\text{Al}] = 16.67$  mM).

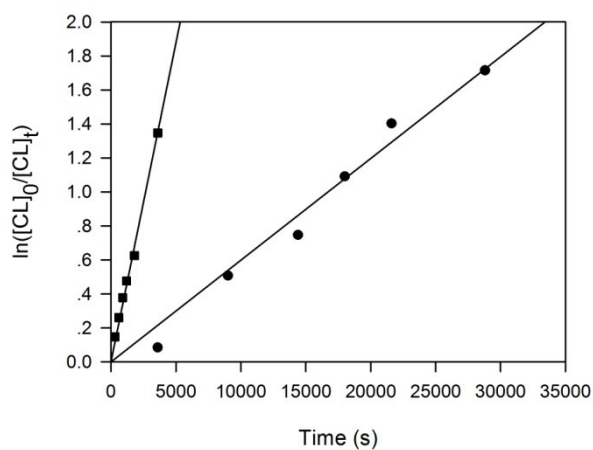

**Fig. S58** Semilogarithmic plots of  $\epsilon$ -CL conversion versus time in  $C_6D_6$  at 40 °C with complexes **9a** (■) and **9b** (●) ( $[\epsilon\text{-CL}]_0/[\text{Al}] = 50$ ,  $[\text{Al}]/[\text{PhCH}_2\text{OH}] = 1$ ,  $[\epsilon\text{-CL}]_0 = 0.83$  M,  $[\text{Al}] = 16.67$  mM).

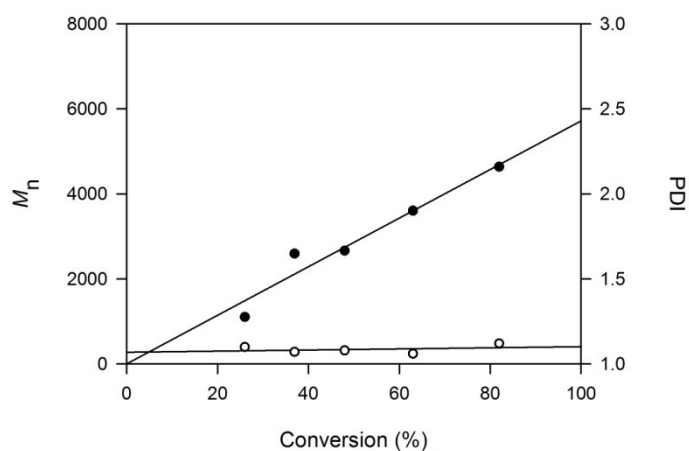

**Fig. S59** Plot of PLA  $M_n$  (●) (versus polystyrene standards) and PDI (○) as a function of monomer conversion for a  $\epsilon$ -CL polymerization using **1b**/PhCH<sub>2</sub>OH ( $[\epsilon\text{-CL}]_0/[\text{Al}] = 50$ ,  $C_6D_6$ , 40 °C).
